# Supplementary material for: Anti-Inflammatory Cembrane-Type Diterpenoids and Prostaglandins from Soft Coral Lobophytum sarcophytoides
Source: PubMed Central journal article supplement (PMC6723591; doi:10.3390/md17080481), 2019-08-19

## Supplementary materials for

# Anti-inflammatory cembrane-type diterpenoids and prostaglandins from soft coral *Lobophytum sarcophytoides*

Hongjie Shen <sup>1,‡</sup>, Xiaowan Liu <sup>2,‡</sup>, Minghua Jiang <sup>1</sup>, Guangyuan Luo <sup>1</sup>, Zhengher Wu <sup>1</sup>, Bin Chen <sup>1</sup>, Jing Li <sup>1</sup>, Lan Liu <sup>1,3,\*</sup>, and Senhua Chen <sup>1,3,\*</sup>

- 1 School of Marine Sciences, Sun Yat-sen University, Guangzhou 510006, People's Republic of China; shenhj5@mail2.sysu.edu.cn; jiangmh23@mail2.sysu.edu.cn; luogy5@mail2.sysu.edu.cn; wuzher@mail2.sysu.edu.cn; chenbin25@mail.sysu.edu.cn; lijing356@mail.sysu.edu.cn
- 2 Shenzhen Key Laboratory for the Sustainable Use of Marine Biodiversity, Research Centre for the Oceans and Human Health, City University of Hong Kong Shenzhen Research Institute, Shenzhen 518057, China; xiaowl2222-x@my.cityu.edu.hk;
- 3 Southern Laboratory of Ocean Science and Engineering (Guangdong, Zhuhai), Zhuhai 519000, China;  
\* Correspondence: chensenh@mail.sysu.edu.cn; cesllan@mail.sysu.edu.cn. Tel.: +86-020-84725459;  
‡ These authors contributed equally to this work.

|                                                                                                                    |    |
|--------------------------------------------------------------------------------------------------------------------|----|
| <b>Figure S1.</b> HR-ESIMS of <b>1</b> .....                                                                       | 4  |
| <b>Figure S2.</b> IR spectrum of <b>1</b> .....                                                                    | 4  |
| <b>Figure S3.</b> <sup>1</sup> H (400 MHz) NMR spectrum of <b>1</b> in acetone- <i>d</i> <sub>6</sub> .....        | 5  |
| <b>Figure S4.</b> <sup>13</sup> C NMR spectrum of <b>1</b> in acetone- <i>d</i> <sub>6</sub> .....                 | 5  |
| <b>Figure S5.</b> <sup>1</sup> H- <sup>1</sup> H COSY spectrum of <b>1</b> in acetone- <i>d</i> <sub>6</sub> ..... | 6  |
| <b>Figure S6.</b> HSQC spectrum of <b>1</b> in acetone- <i>d</i> <sub>6</sub> .....                                | 6  |
| <b>Figure S7.</b> HMBC spectrum of <b>1</b> in acetone- <i>d</i> <sub>6</sub> .....                                | 7  |
| <b>Figure S8.</b> NOESY spectrum of <b>1</b> in acetone- <i>d</i> <sub>6</sub> .....                               | 8  |
| <b>Figure S9.</b> HR-ESIMS of <b>3</b> .....                                                                       | 8  |
| <b>Figure S10.</b> IR spectrum of <b>3</b> .....                                                                   | 9  |
| <b>Figure S11.</b> <sup>1</sup> H (400 MHz) NMR spectrum of <b>3</b> in CDCl <sub>3</sub> .....                    | 9  |
| <b>Figure S12.</b> <sup>13</sup> C NMR spectrum of <b>3</b> in CDCl <sub>3</sub> .....                             | 10 |
| <b>Figure S13.</b> <sup>1</sup> H- <sup>1</sup> H COSY spectrum of <b>3</b> in CDCl <sub>3</sub> .....             | 10 |
| <b>Figure S14.</b> HSQC spectrum of <b>3</b> in CDCl <sub>3</sub> .....                                            | 11 |
| <b>Figure S15.</b> HMBC spectrum of <b>3</b> in CDCl <sub>3</sub> .....                                            | 11 |
| <b>Figure S16.</b> NOESY spectrum of <b>3</b> in CDCl <sub>3</sub> .....                                           | 12 |
| <b>Figure S17.</b> HR-ESIMS of <b>10</b> .....                                                                     | 12 |
| <b>Figure S18.</b> IR spectrum of <b>10</b> .....                                                                  | 13 |
| <b>Figure S19.</b> <sup>1</sup> H (400 MHz) NMR spectrum of <b>10</b> in MeOH- <i>d</i> <sub>4</sub> .....         | 13 |
| <b>Figure S20.</b> <sup>13</sup> C NMR spectrum of <b>10</b> in MeOH- <i>d</i> <sub>4</sub> .....                  | 14 |
| <b>Figure S21.</b> <sup>1</sup> H- <sup>1</sup> H COSY spectrum of <b>10</b> in MeOH- <i>d</i> <sub>4</sub> .....  | 14 |
| <b>Figure S22.</b> HSQC spectrum of <b>10</b> in MeOH- <i>d</i> <sub>4</sub> .....                                 | 15 |
| <b>Figure S23.</b> HMBC spectrum of <b>10</b> in MeOH- <i>d</i> <sub>4</sub> .....                                 | 16 |
| <b>Figure S24.</b> NOESY spectrum of <b>10</b> in MeOH- <i>d</i> <sub>4</sub> .....                                | 16 |
| <b>Figure S25.</b> HR-ESIMS of <b>11</b> .....                                                                     | 17 |
| <b>Figure S26.</b> IR spectrum of <b>11</b> .....                                                                  | 17 |
| <b>Figure S27.</b> <sup>1</sup> H (400 MHz) NMR spectrum of <b>11</b> in MeOH- <i>d</i> <sub>4</sub> .....         | 18 |
| <b>Figure S28.</b> <sup>13</sup> C NMR spectrum of <b>11</b> in MeOH- <i>d</i> <sub>4</sub> .....                  | 18 |
| <b>Figure S29.</b> <sup>1</sup> H- <sup>1</sup> H COSY spectrum of <b>11</b> in MeOH- <i>d</i> <sub>4</sub> .....  | 19 |
| <b>Figure S30.</b> HSQC spectrum of <b>11</b> in MeOH- <i>d</i> <sub>4</sub> .....                                 | 19 |
| <b>Figure S31.</b> HMBC spectrum of <b>11</b> in MeOH- <i>d</i> <sub>4</sub> .....                                 | 20 |

|                                                                                                       |    |
|-------------------------------------------------------------------------------------------------------|----|
| <b>Figure S32.</b> HR-ESIMS of <b>12</b> .....                                                        | 21 |
| <b>Figure S33.</b> IR spectrum of <b>12</b> .....                                                     | 21 |
| <b>Figure S34.</b> $^1\text{H}$ (400 MHz) NMR spectrum of <b>12</b> in $\text{MeOH-}d_4$ .....        | 22 |
| <b>Figure S35.</b> $^{13}\text{C}$ NMR spectrum of <b>11</b> in $\text{MeOH-}d_4$ .....               | 22 |
| <b>Figure S36.</b> $^1\text{H-}^1\text{H}$ COSY spectrum of <b>12</b> in $\text{MeOH-}d_4$ .....      | 23 |
| <b>Figure S37.</b> HSQC spectrum of <b>12</b> in $\text{MeOH-}d_4$ .....                              | 23 |
| <b>Figure S38.</b> HMBC spectrum of <b>12</b> in $\text{MeOH-}d_4$ .....                              | 24 |
| <b>Figure S39.</b> NOESY spectrum of <b>12</b> in $\text{MeOH-}d_4$ .....                             | 24 |
| <b>Figure S40.</b> HR-ESIMS of <b>13</b> .....                                                        | 25 |
| <b>Figure S41.</b> IR spectrum of <b>13</b> .....                                                     | 25 |
| <b>Figure S42.</b> $^1\text{H}$ (400 MHz) NMR spectrum of <b>13</b> in $\text{acetone-}d_6$ .....     | 26 |
| <b>Figure S43.</b> $^{13}\text{C}$ NMR spectrum of <b>13</b> in $\text{acetone-}d_6$ .....            | 26 |
| <b>Figure S44.</b> $^1\text{H-}^1\text{H}$ COSY spectrum of <b>13</b> in $\text{acetone-}d_6$ .....   | 27 |
| <b>Figure S45.</b> HSQC spectrum of <b>13</b> in $\text{acetone-}d_6$ .....                           | 27 |
| <b>Figure S46.</b> HMBC spectrum of <b>13</b> in $\text{acetone-}d_6$ .....                           | 28 |
| <b>Figure S47.</b> $^1\text{H}$ (400 MHz) NMR spectrum of <b>10a</b> in $\text{pyridine-}d_5$ .....   | 28 |
| <b>Figure S48.</b> $^1\text{H}$ (400 MHz) NMR spectrum of <b>10b</b> in $\text{pyridine-}d_5$ .....   | 29 |
| <b>Figure S49.</b> $^1\text{H}$ (400 MHz) NMR spectrum of <b>15a</b> in $\text{pyridine-}d_5$ .....   | 29 |
| <b>Figure S50.</b> $^1\text{H-}^1\text{H}$ COSY spectrum of <b>15a</b> in $\text{pyridine-}d_5$ ..... | 30 |
| <b>Figure S51.</b> $^1\text{H}$ (400 MHz) NMR spectrum of <b>15b</b> in $\text{pyridine-}d_5$ .....   | 30 |
| <b>Figure S52.</b> $^1\text{H-}^1\text{H}$ COSY spectrum of <b>15b</b> in $\text{pyridine-}d_5$ ..... | 31 |

**Figure S1. HR-ESIMS of 1.**

28-Jan-2019,16:46:04

1901A1037-40-2-3-2-3-35-neg 21 (0.135) Cm (18:24)

1: TOF MS ES-  
2.02e6

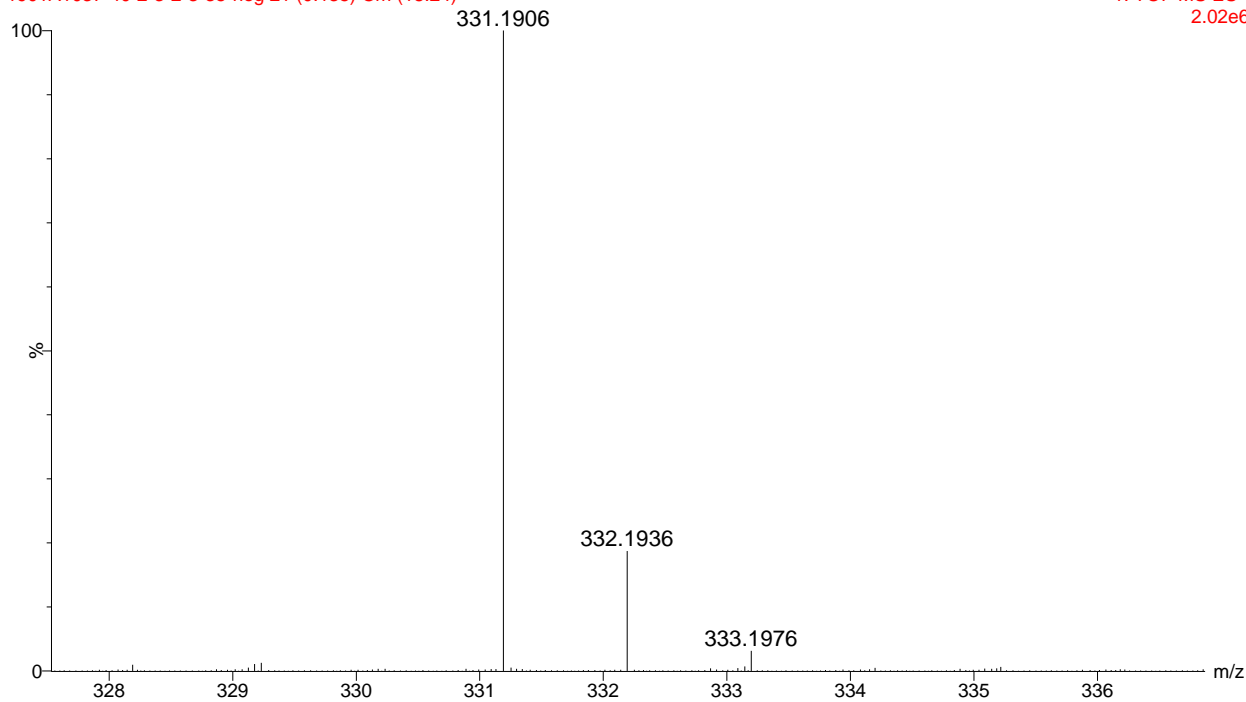

**Figure S2. IR spectrum of 1.**

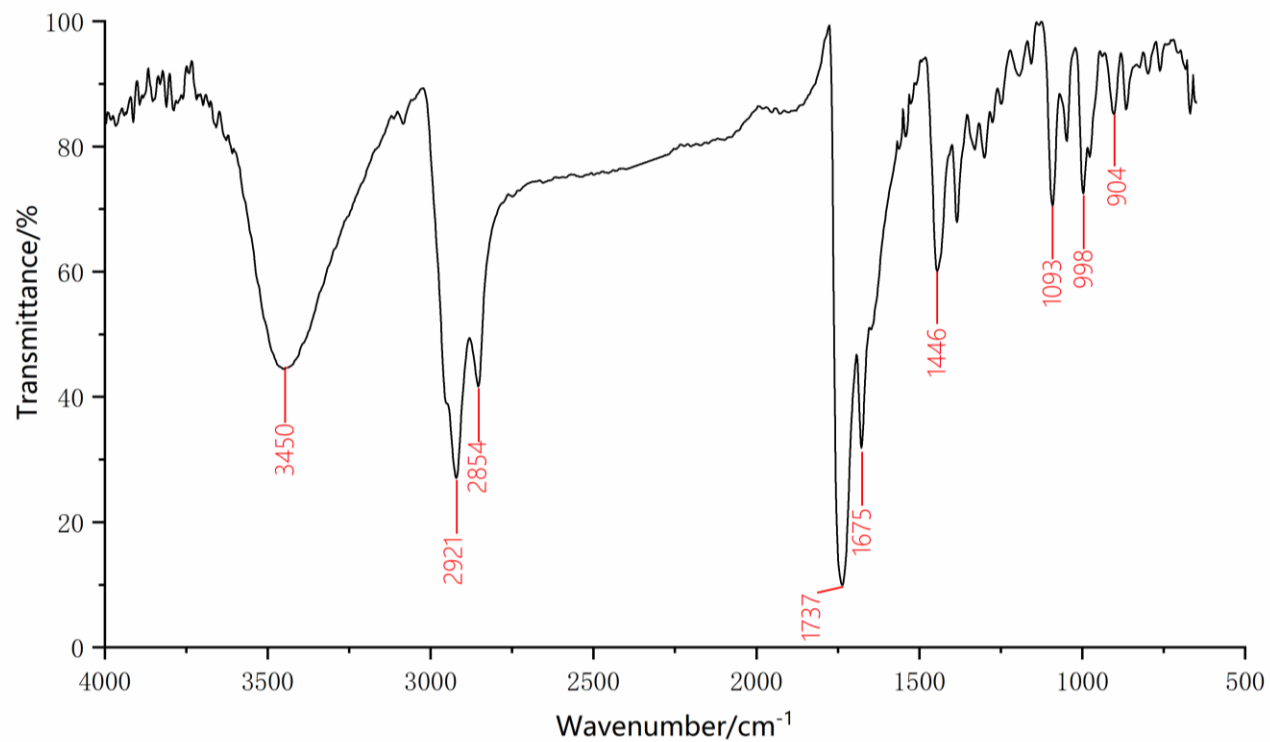

**Figure S3.**  $^1\text{H}$  (400 MHz) NMR spectrum of **1** in acetone- $d_6$ .

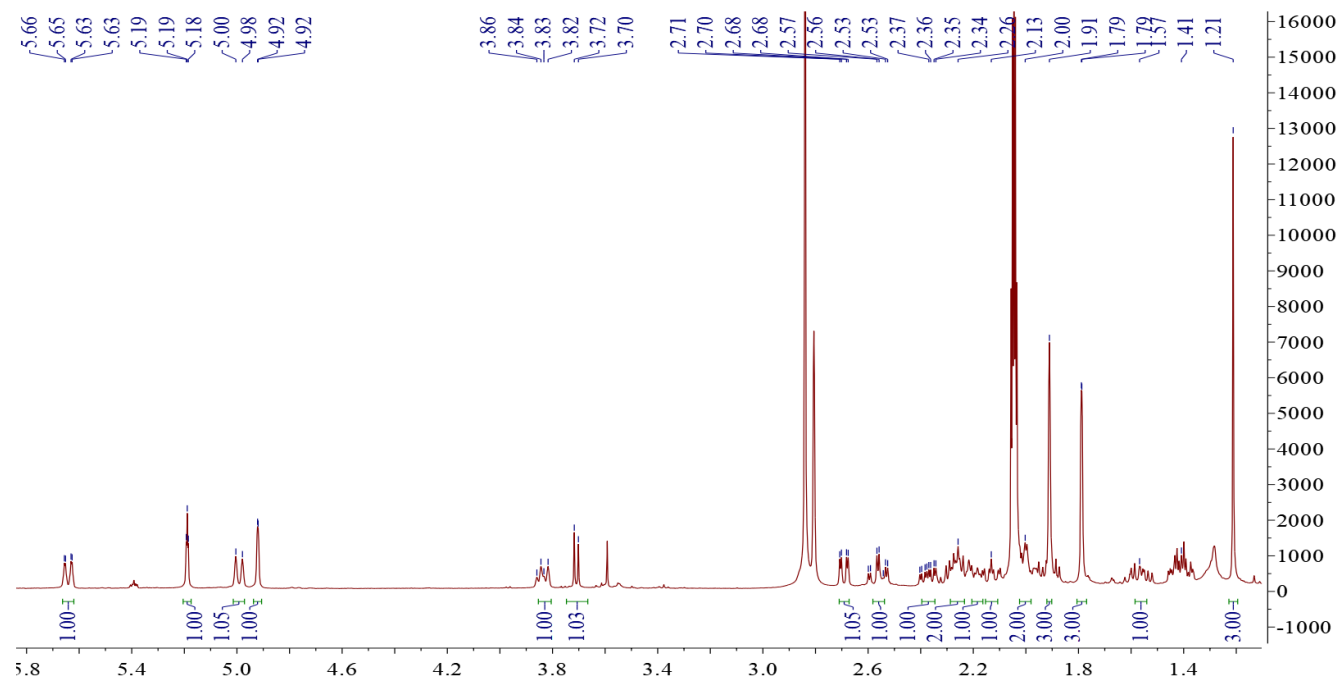

**Figure S4.**  $^{13}\text{C}$  NMR spectrum of **1** in acetone- $d_6$ .

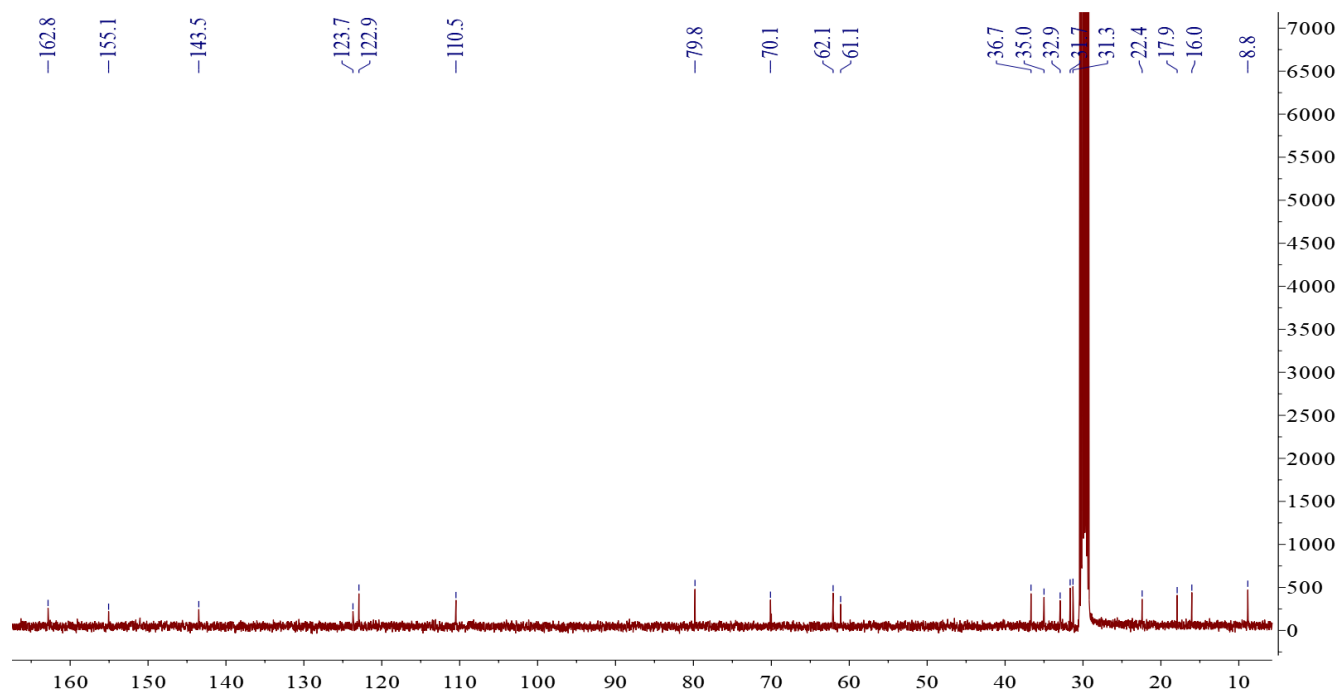

**Figure S5.**  $^1\text{H}$ - $^1\text{H}$  COSY spectrum of **1** in acetone- $d_6$ .

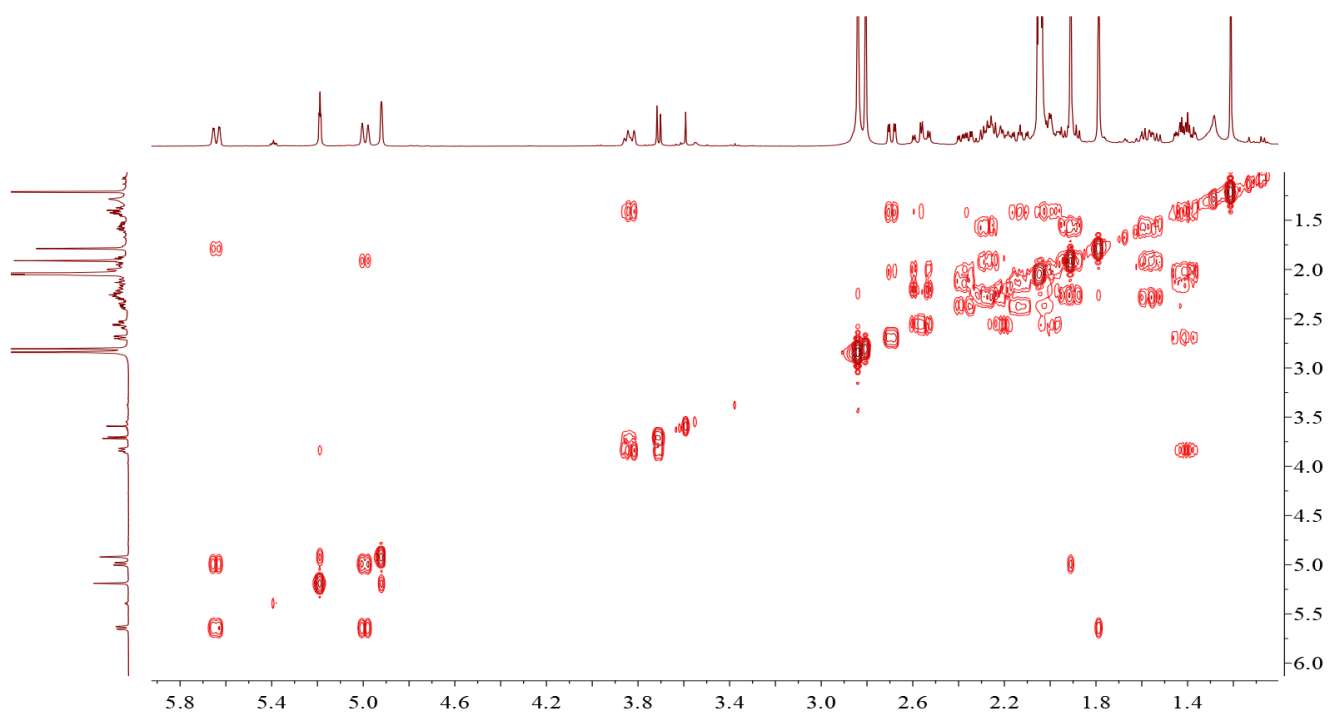

**Figure S6.** HSQC spectrum of **1** in acetone- $d_6$ .

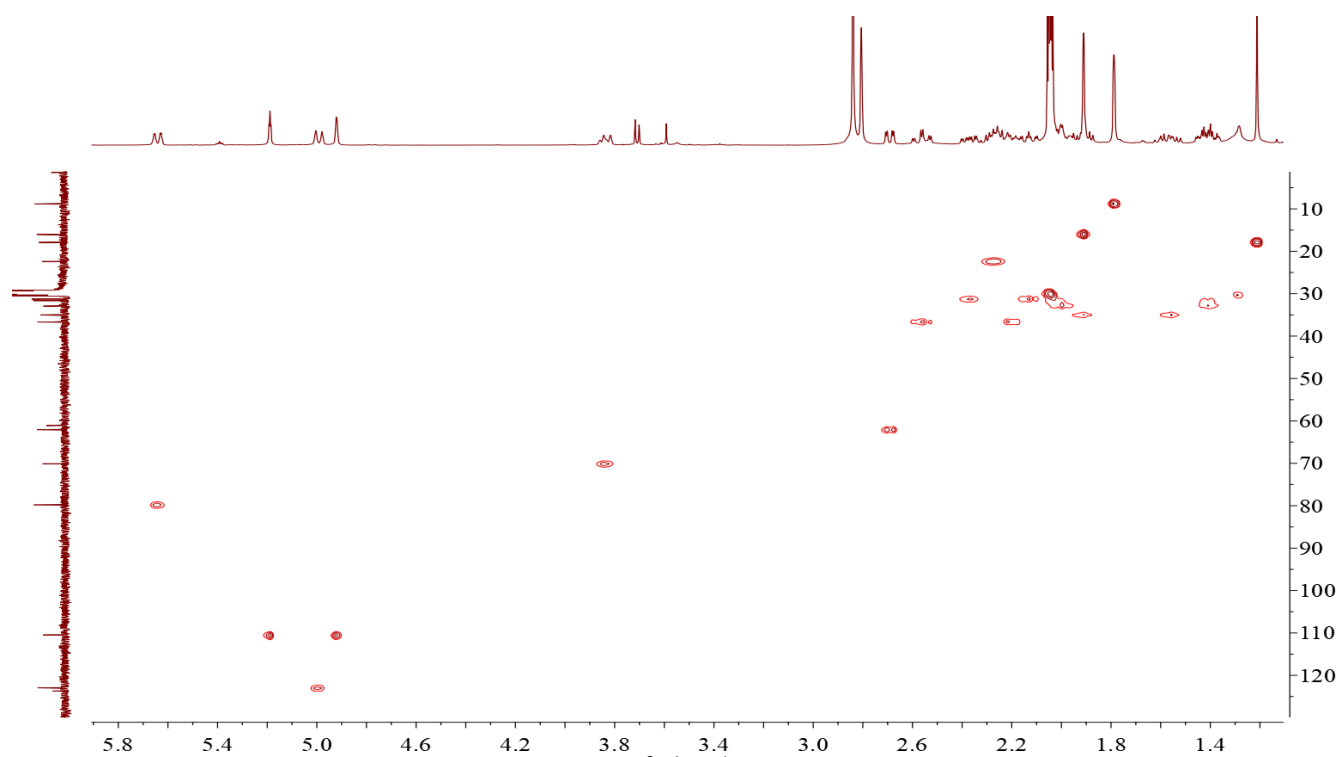

**Figure S7.** HMBC spectrum of **1** in acetone-*d*<sub>6</sub>.

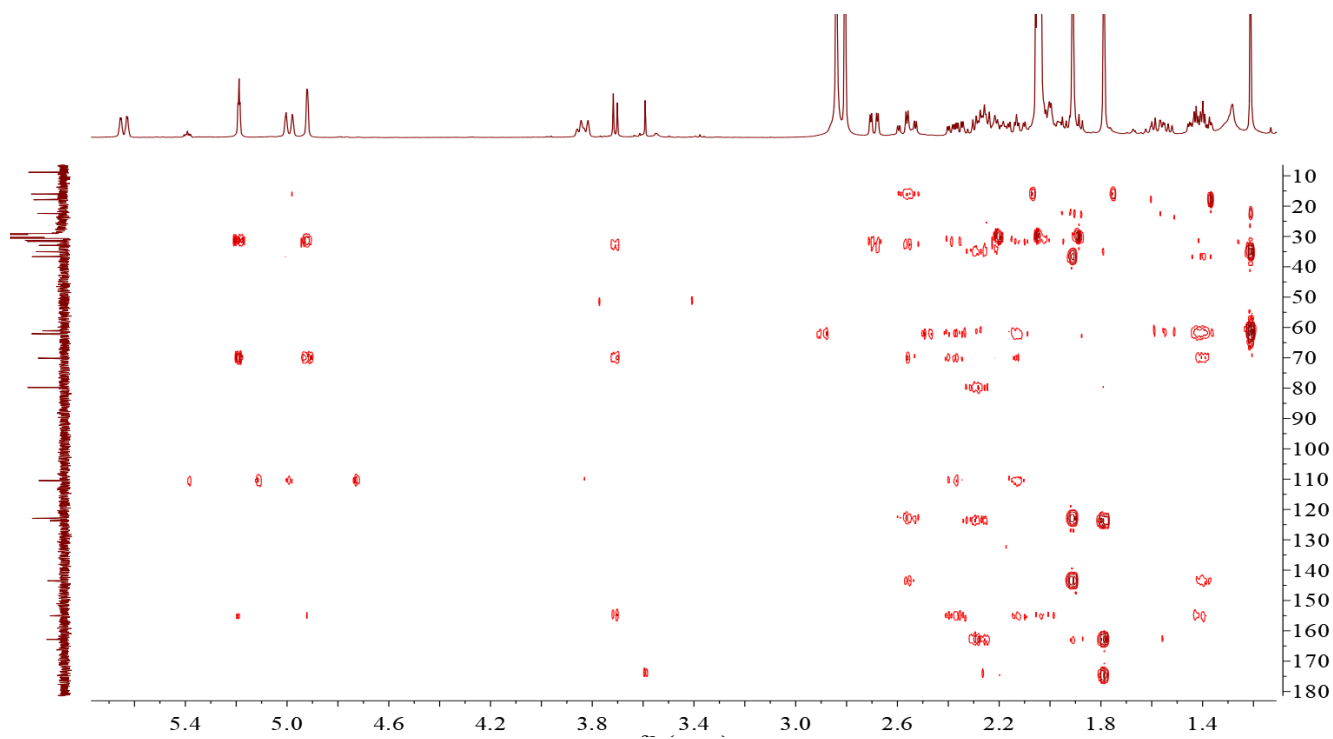

**Figure S8.** NOESY spectrum of **1** in acetone-*d*<sub>6</sub>.

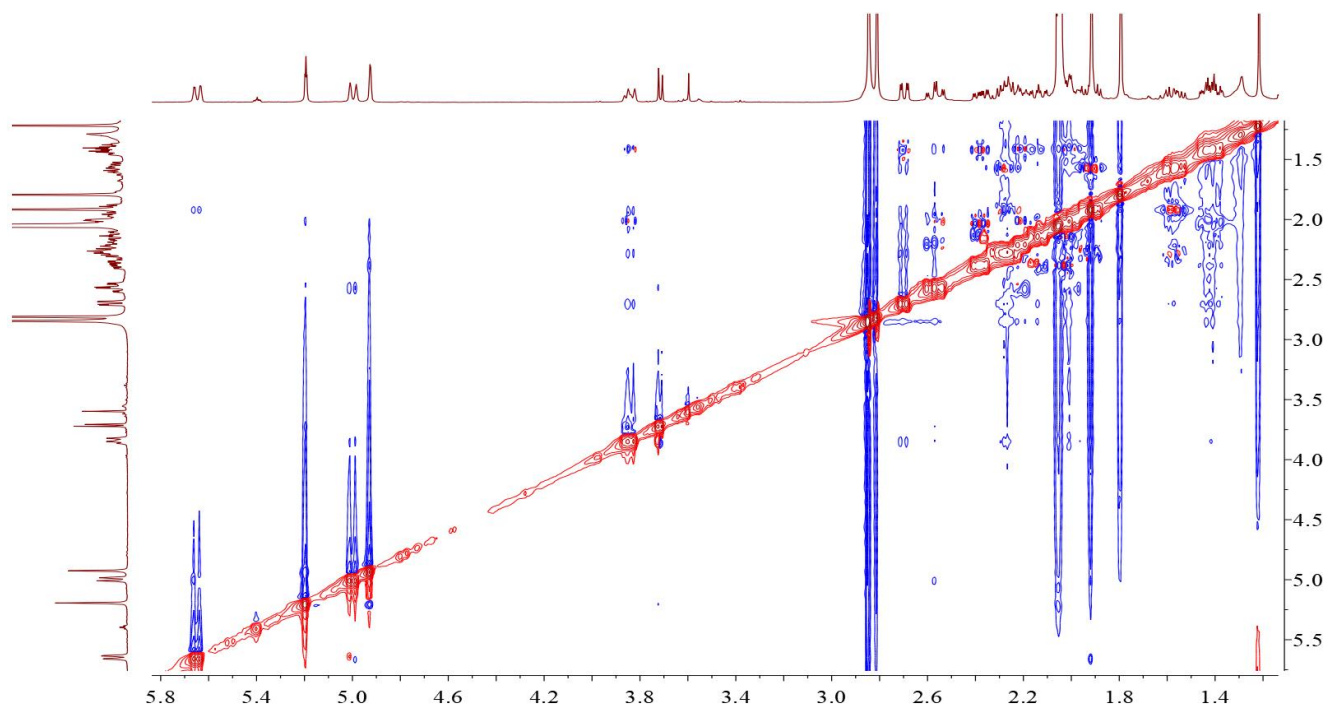

**Figure S9.** HR-ESIMS of **3**

D:\Data\...Liu lan\1906a0131-hrms-neg  
LTQ Orbitrap Elite

6/6/2019 6:08:39 PM

B-17-3-10-2

1906a0131-hrms-neg #6-8 RT: 0.10-0.13 AV: 3 SB: 1 0.66 NL: 7.67E+  
T: FTMS - c ESI Full ms [100.00-1000.00]

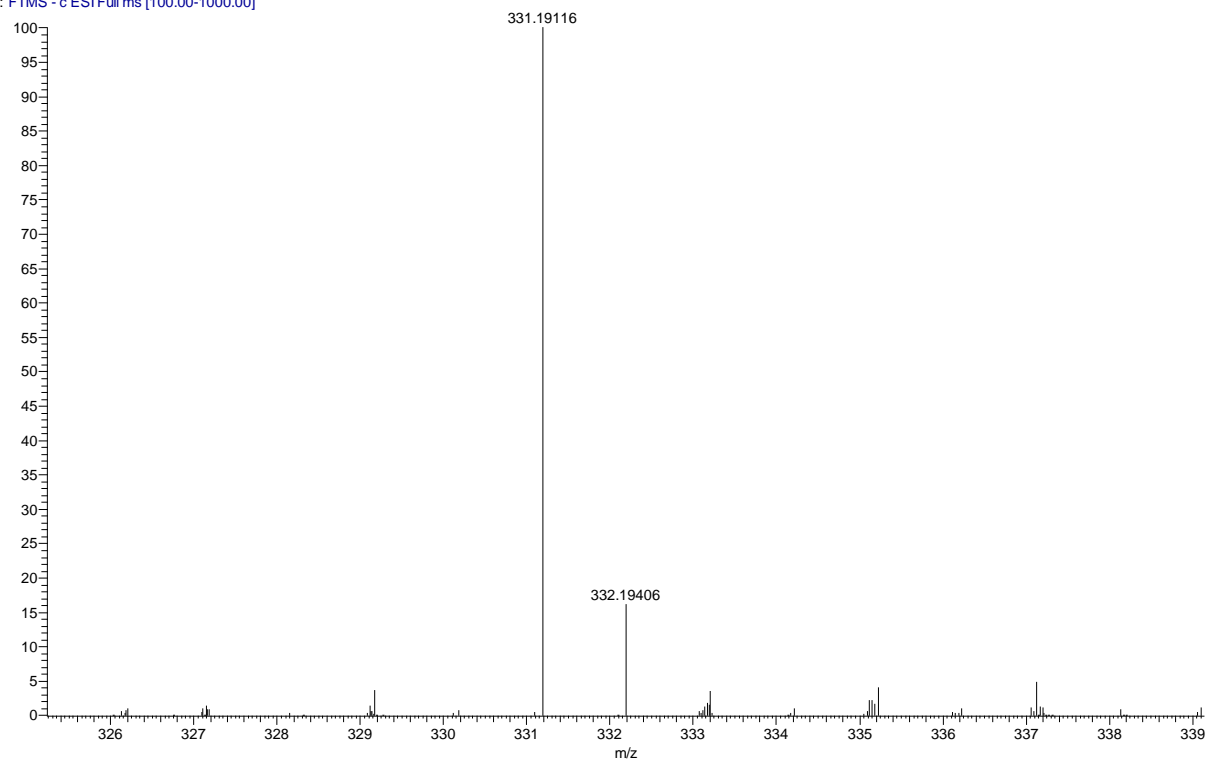



**Figure S10.** IR spectrum of **3**

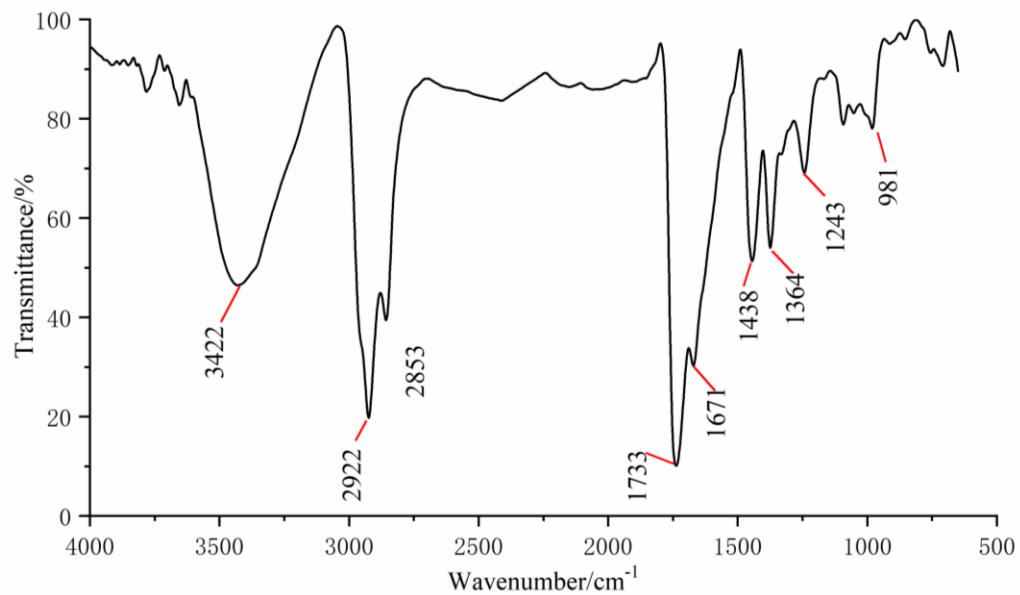

**Figure S11.** <sup>1</sup>H (400 MHz) NMR spectrum of **3** in CDCl<sub>3</sub>

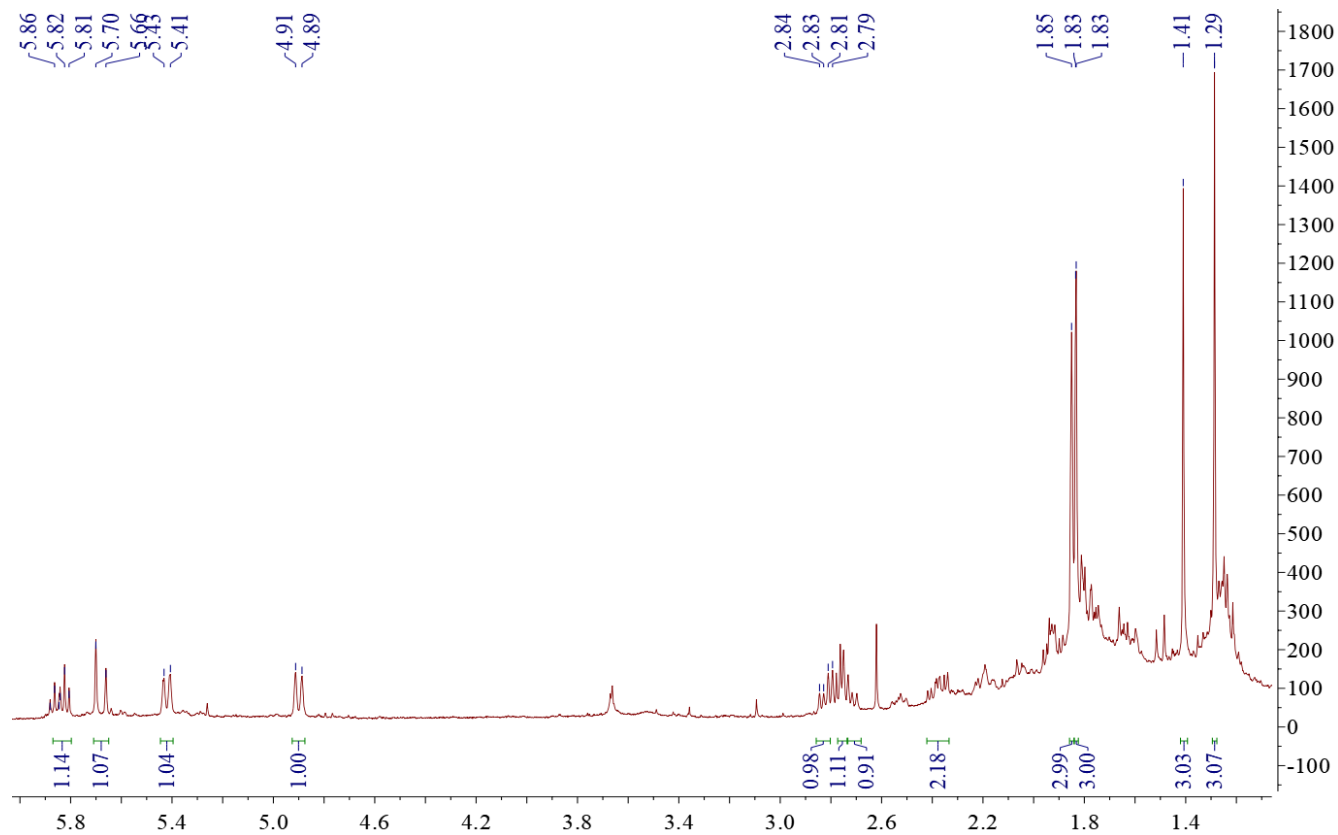

**Figure S12.**  $^{13}\text{C}$  NMR spectrum of **3** in  $\text{CDCl}_3$

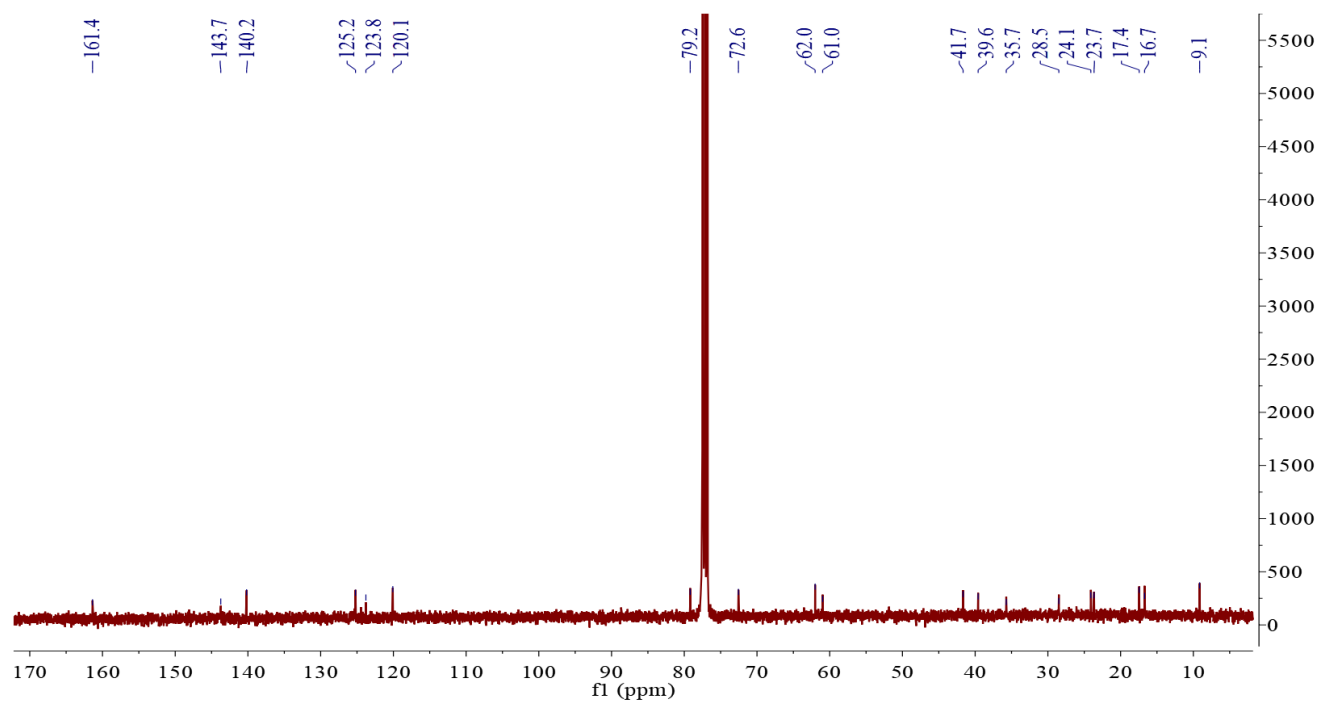

**Figure S13.**  $^1\text{H}$ - $^1\text{H}$  COSY spectrum of **3** in  $\text{CDCl}_3$

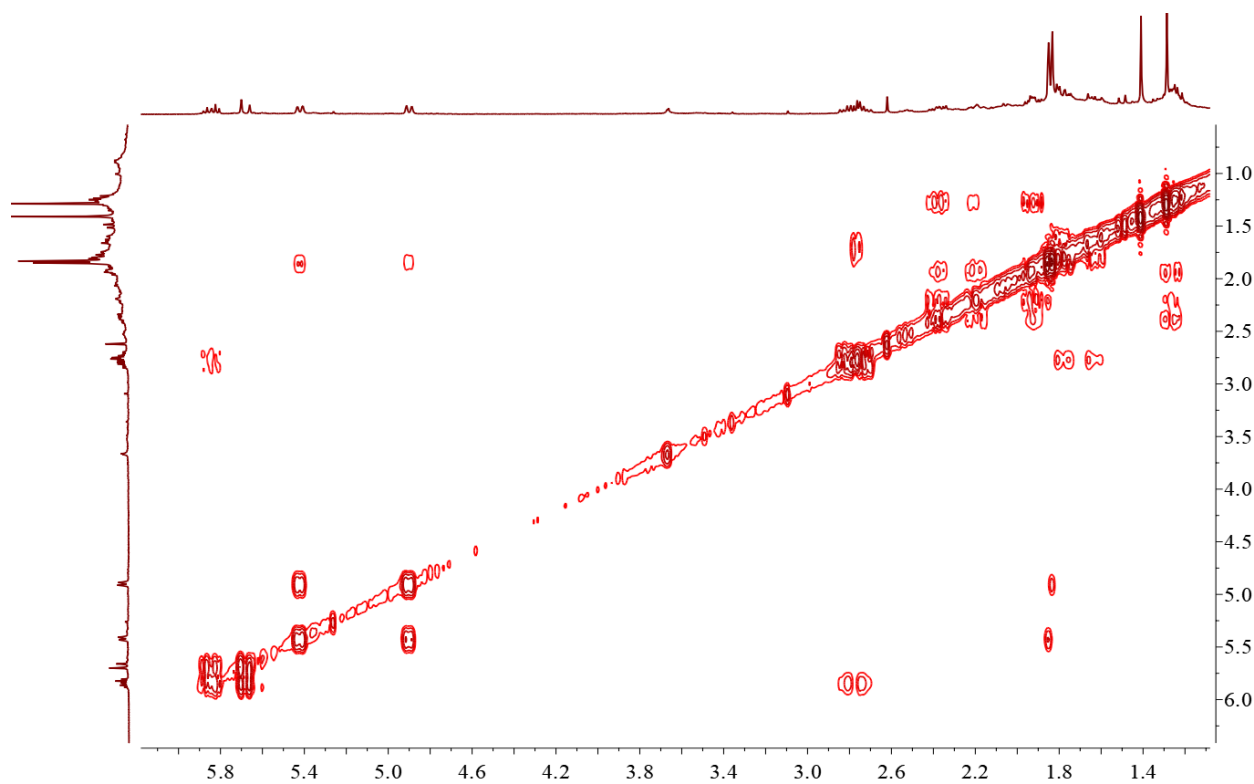

**Figure S14.** HSQC spectrum of **3** in CDCl<sub>3</sub>

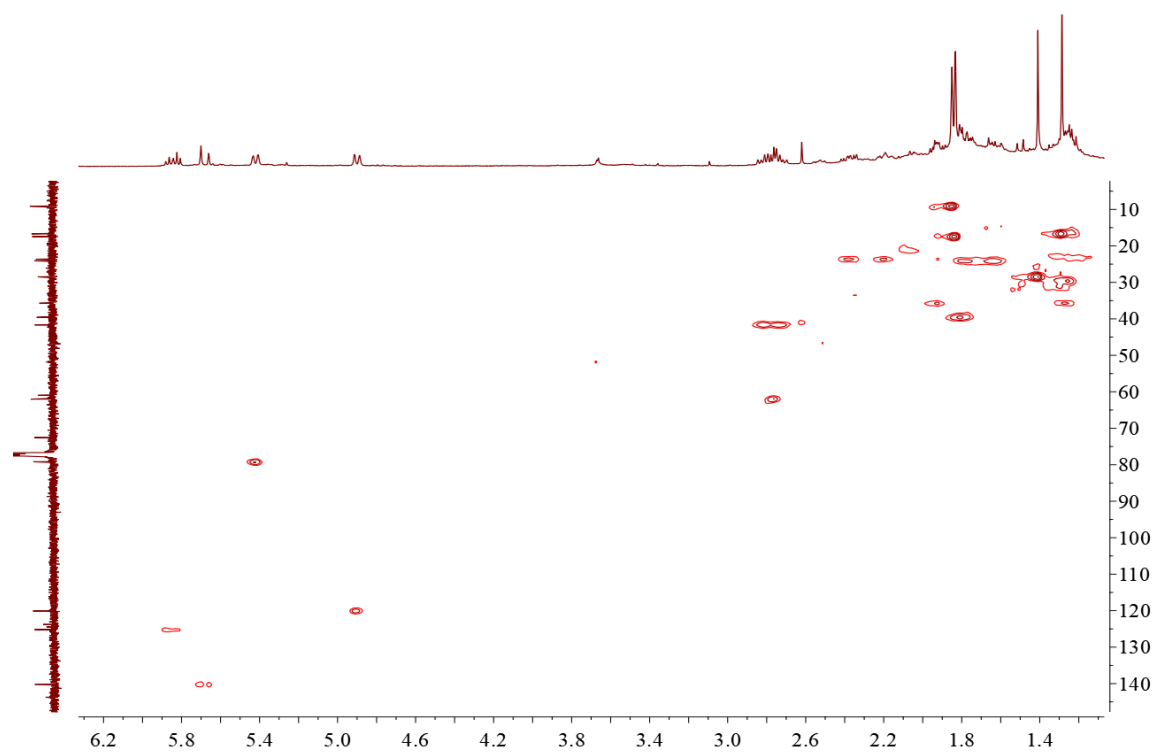

**Figure S15.** HMBC spectrum of **3** in CDCl<sub>3</sub>

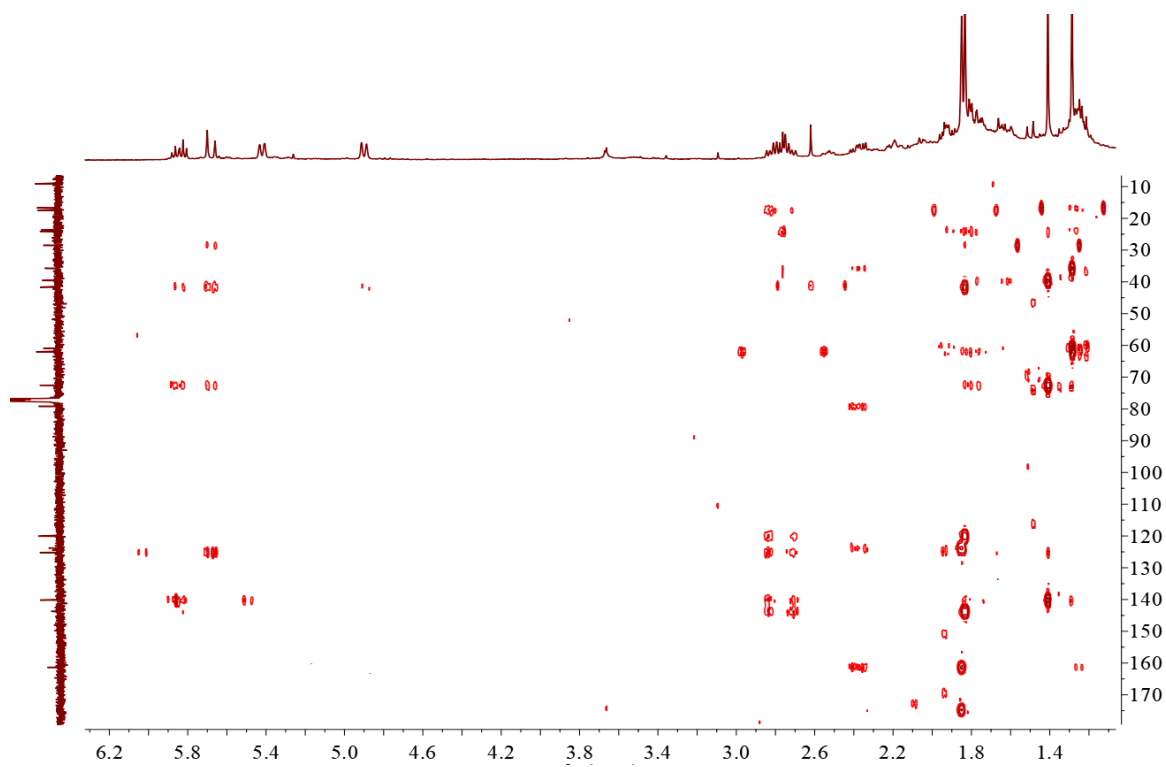

**Figure S16.** NOESY spectrum of **3** in CDCl<sub>3</sub>.

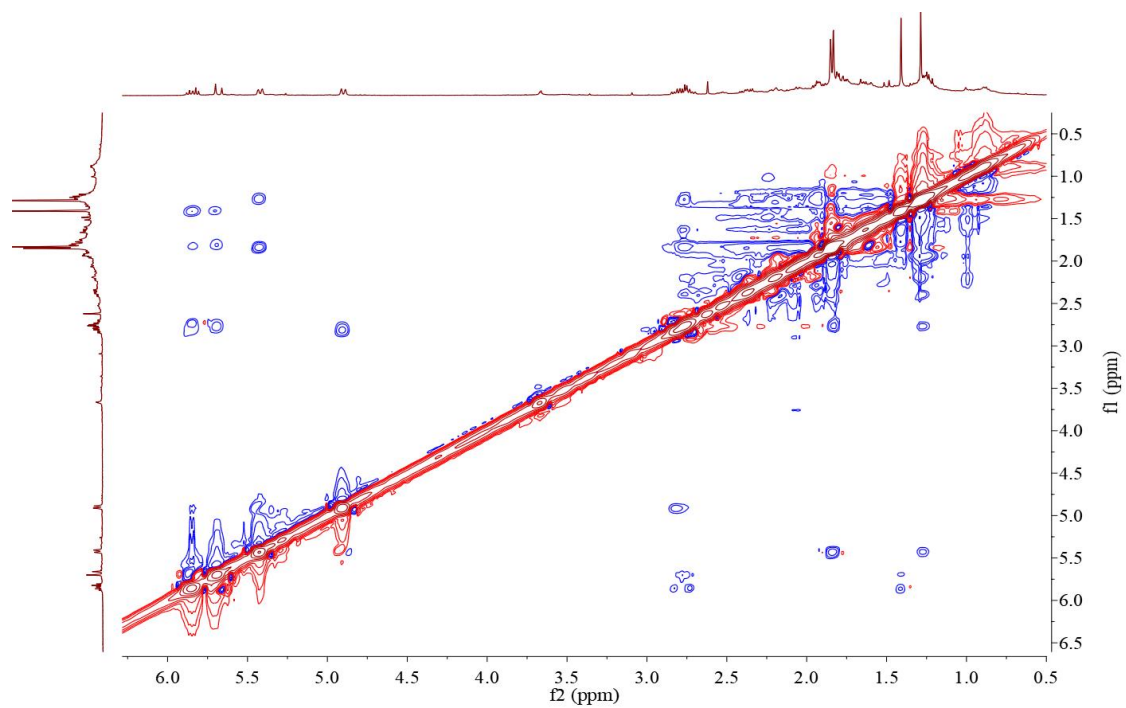

**Figure S17.** HR-ESIMS of **10**

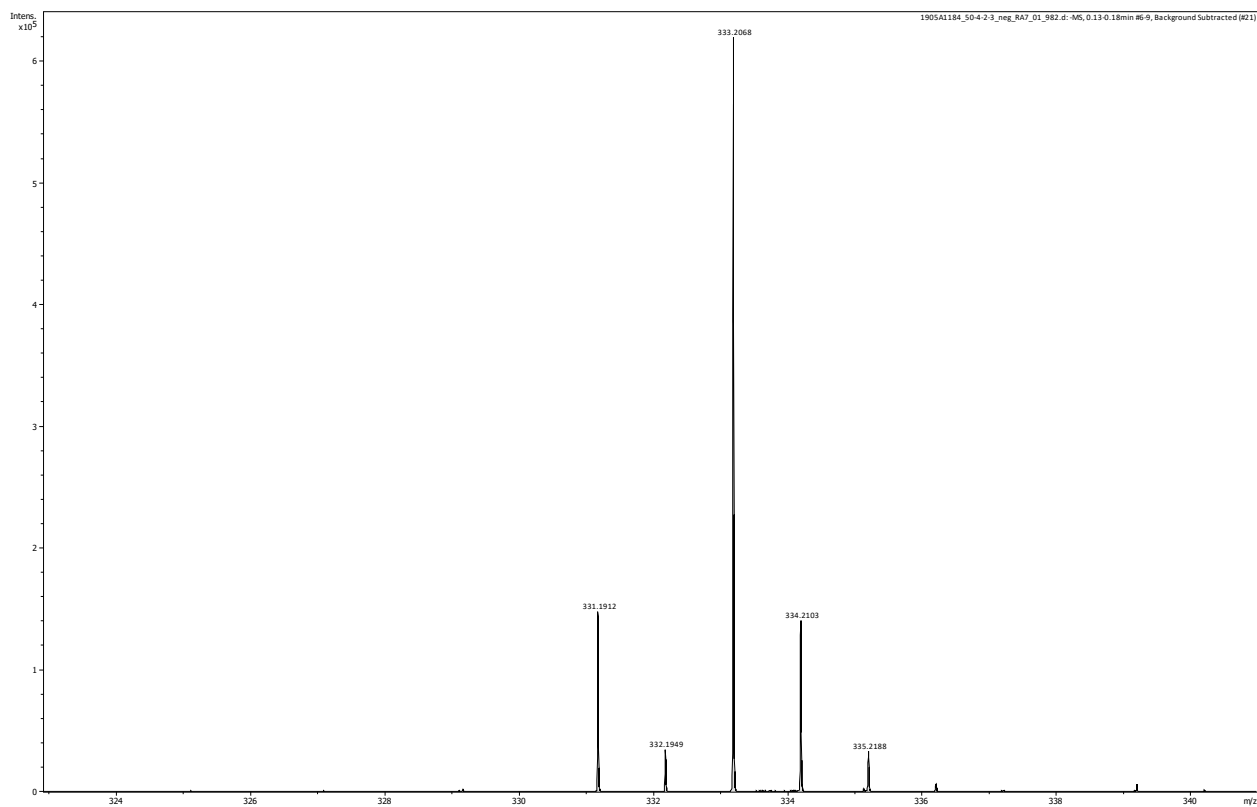

**Figure S18.** IR spectrum of **10**

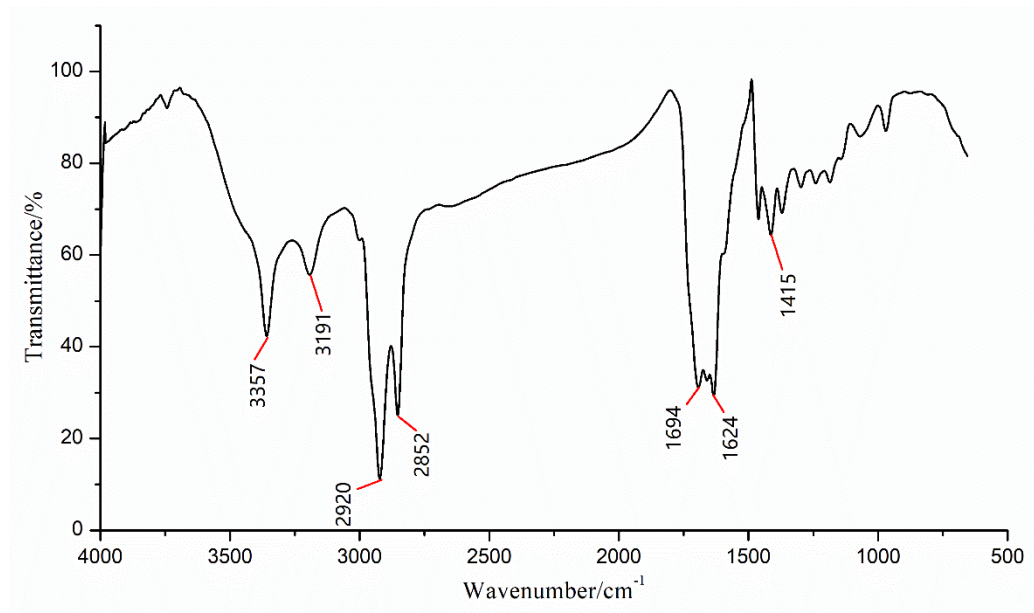

**Figure S19.** <sup>1</sup>H (400 MHz) NMR spectrum of **10** in MeOH-*d*<sub>4</sub>.

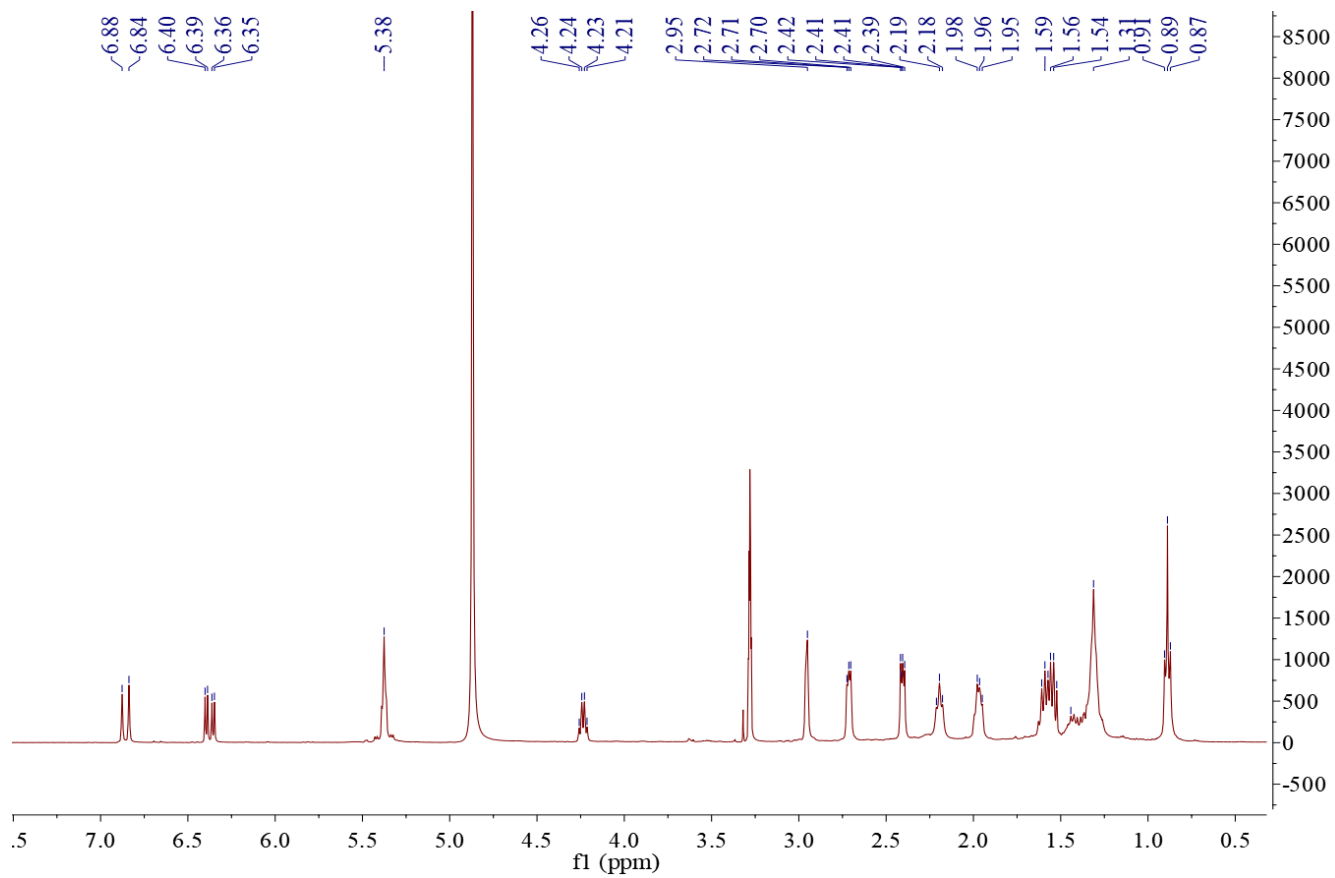

**Figure S20.**  $^{13}\text{C}$  NMR spectrum of **10** in  $\text{MeOH-}d_4$ .

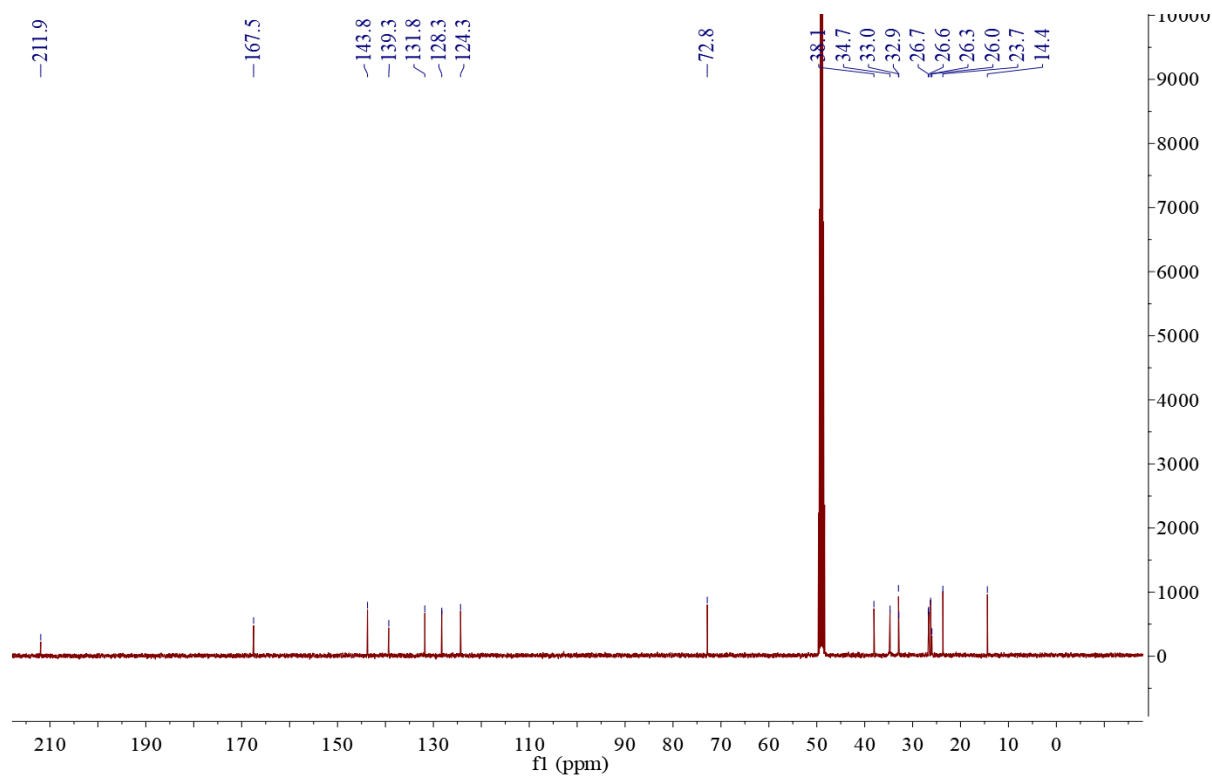

**Figure S21.**  $^1\text{H-}^1\text{H}$  COSY spectrum of **10** in  $\text{MeOH-}d_4$ .

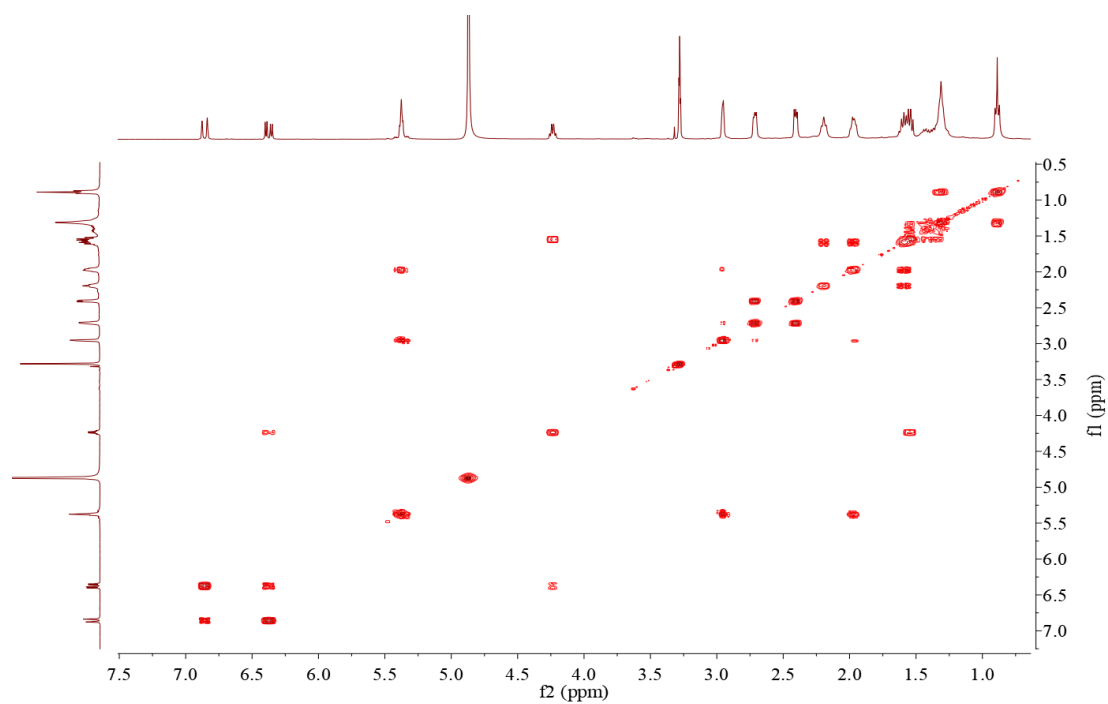

**Figure S22.** HSQC spectrum of **10** in MeOH-*d*<sub>4</sub>.

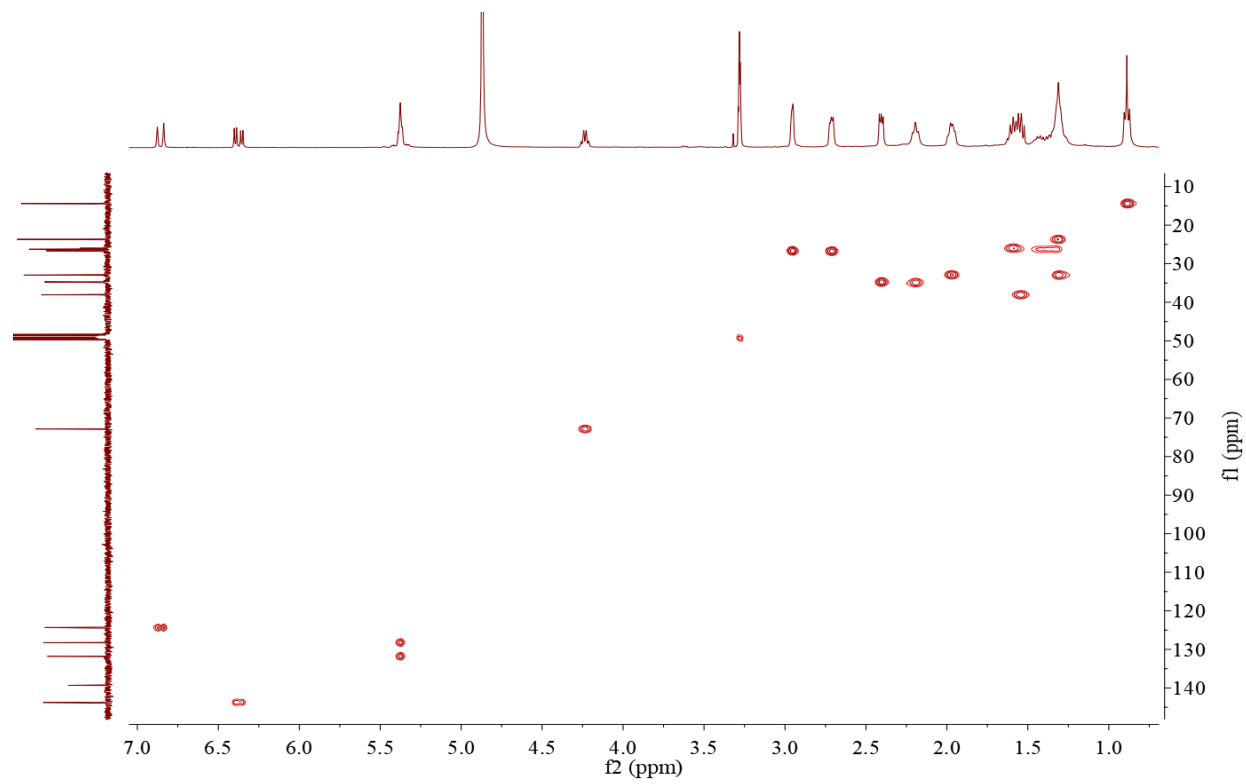

**Figure S23.** HMBC spectrum of **10** in MeOH-*d*<sub>4</sub>

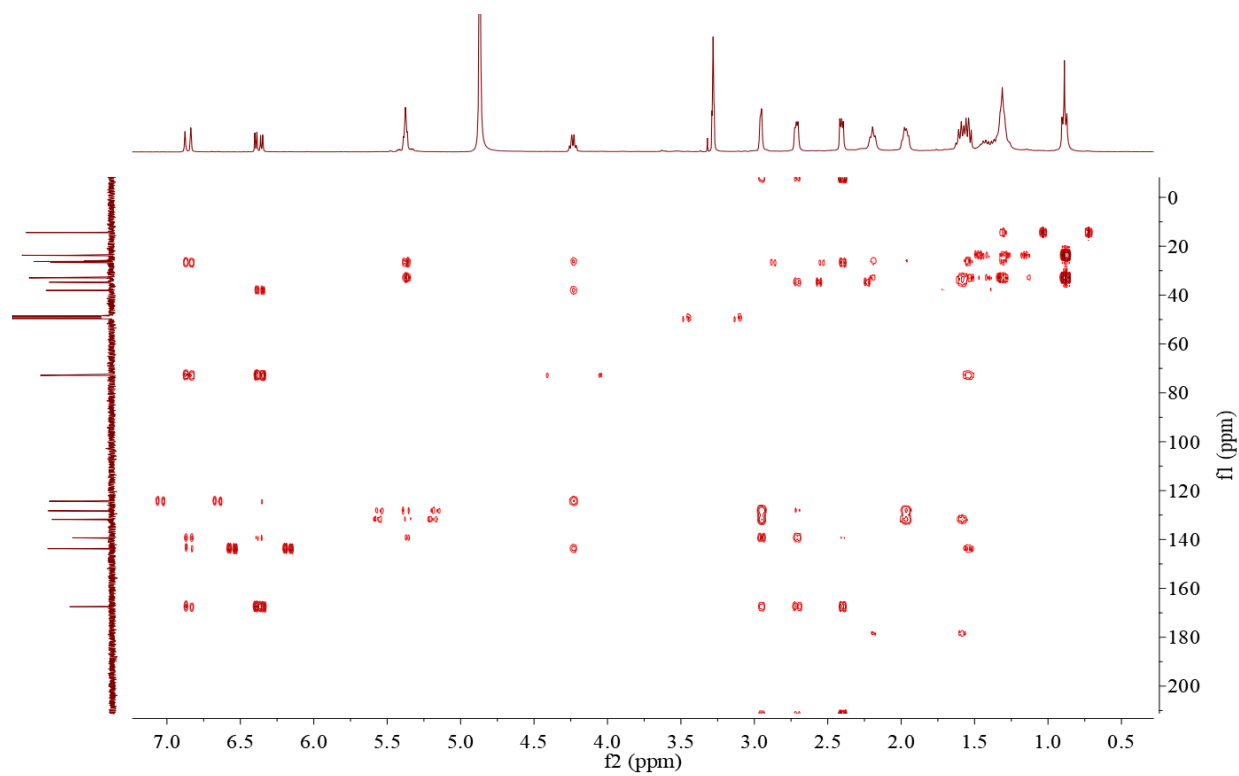

**Figure S24.** NOESY spectrum of **10** in MeOH-*d*<sub>4</sub>

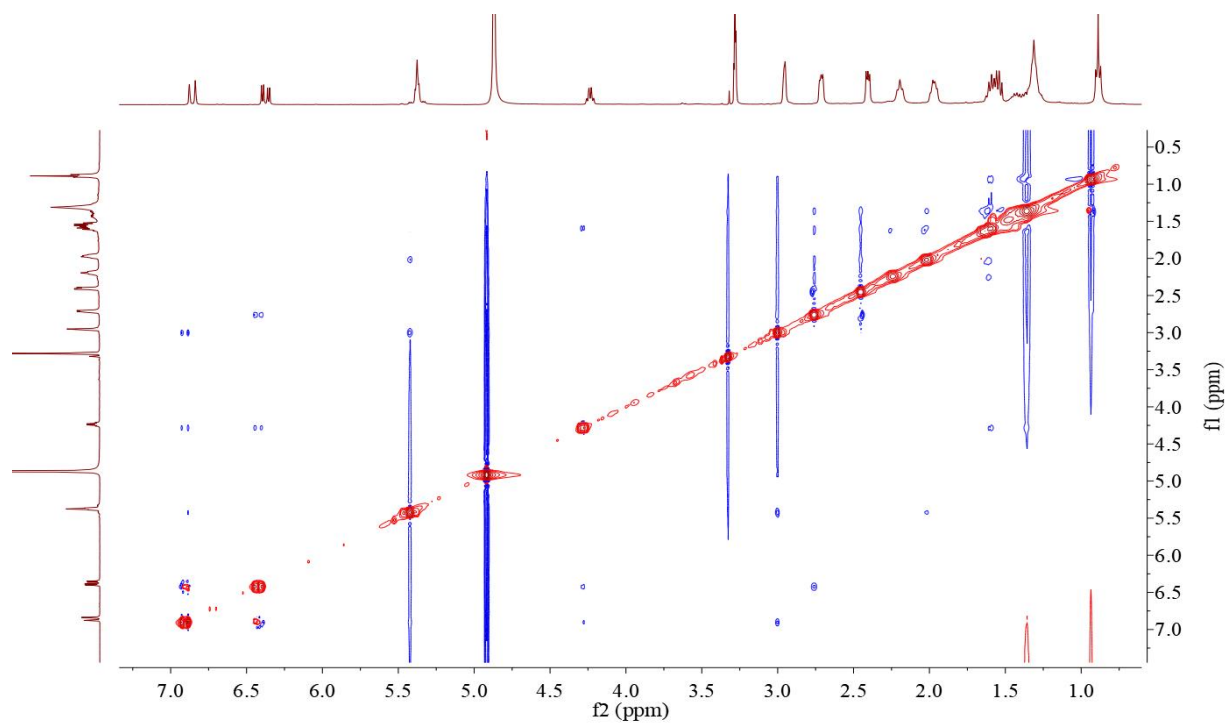



**Figure S25.** HR-ESIMS of **11**

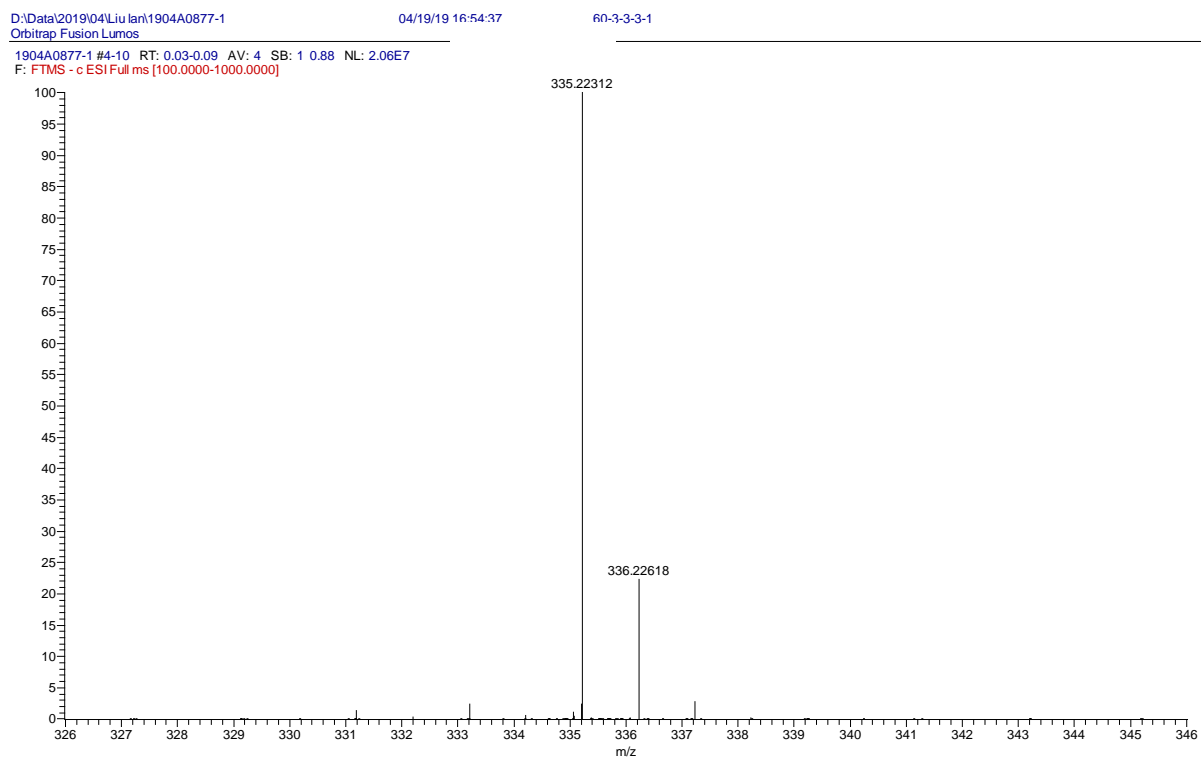

**Figure S26.** IR spectrum of **11**

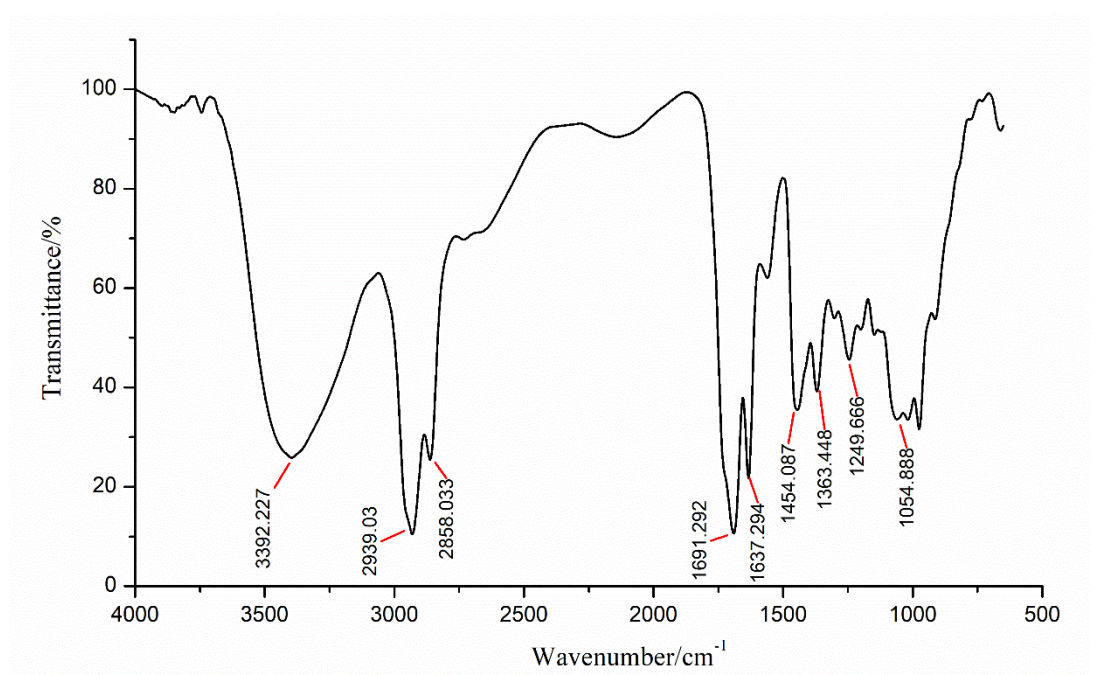

**Figure S27.**  $^1\text{H}$  (400 MHz) NMR spectrum of **11** in  $\text{MeOH-}d_4$

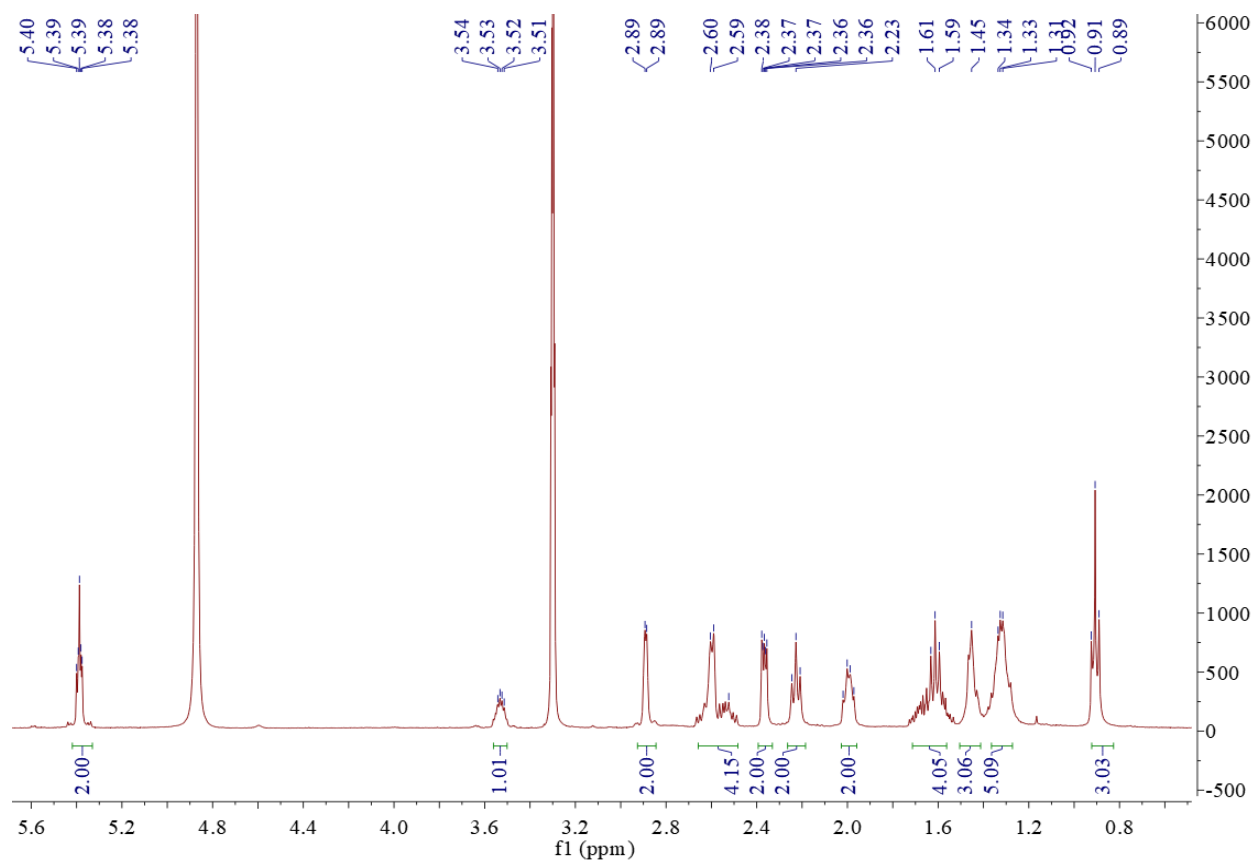

**Figure S28.**  $^{13}\text{C}$  NMR spectrum of **11** in  $\text{MeOH-}d_4$

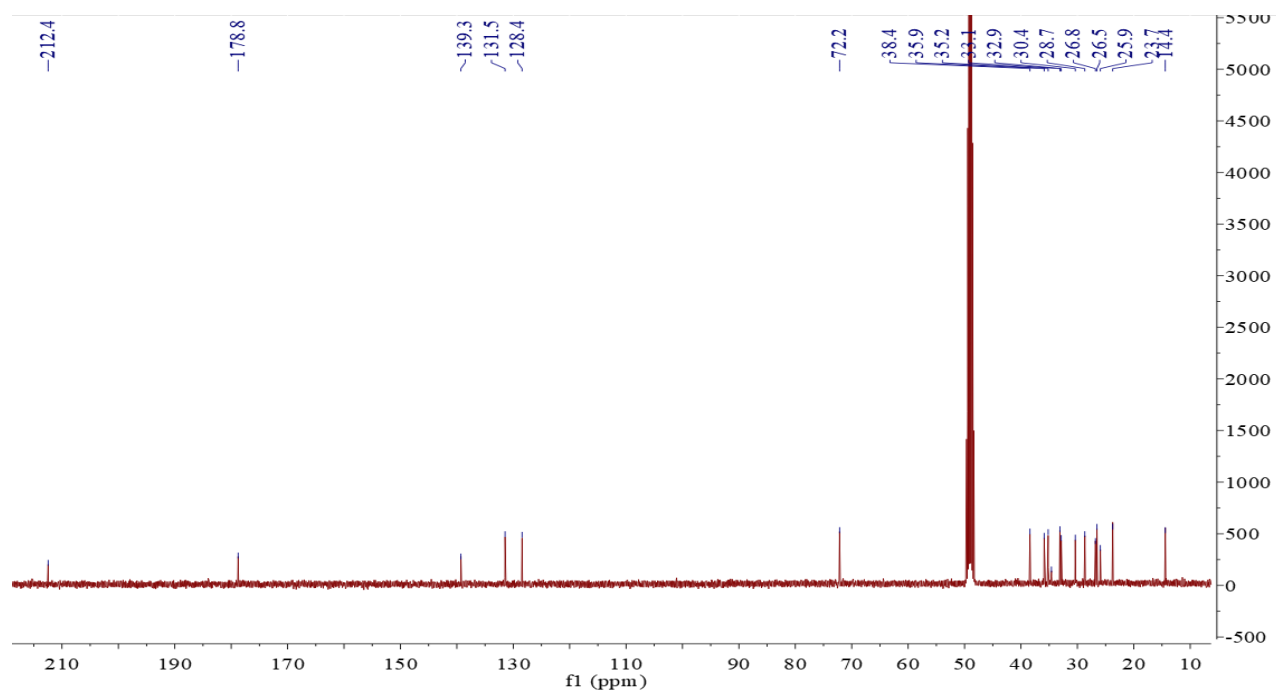

**Figure S29.**  $^1\text{H}$ - $^1\text{H}$  COSY spectrum of **11** in  $\text{MeOH-}d_4$ .

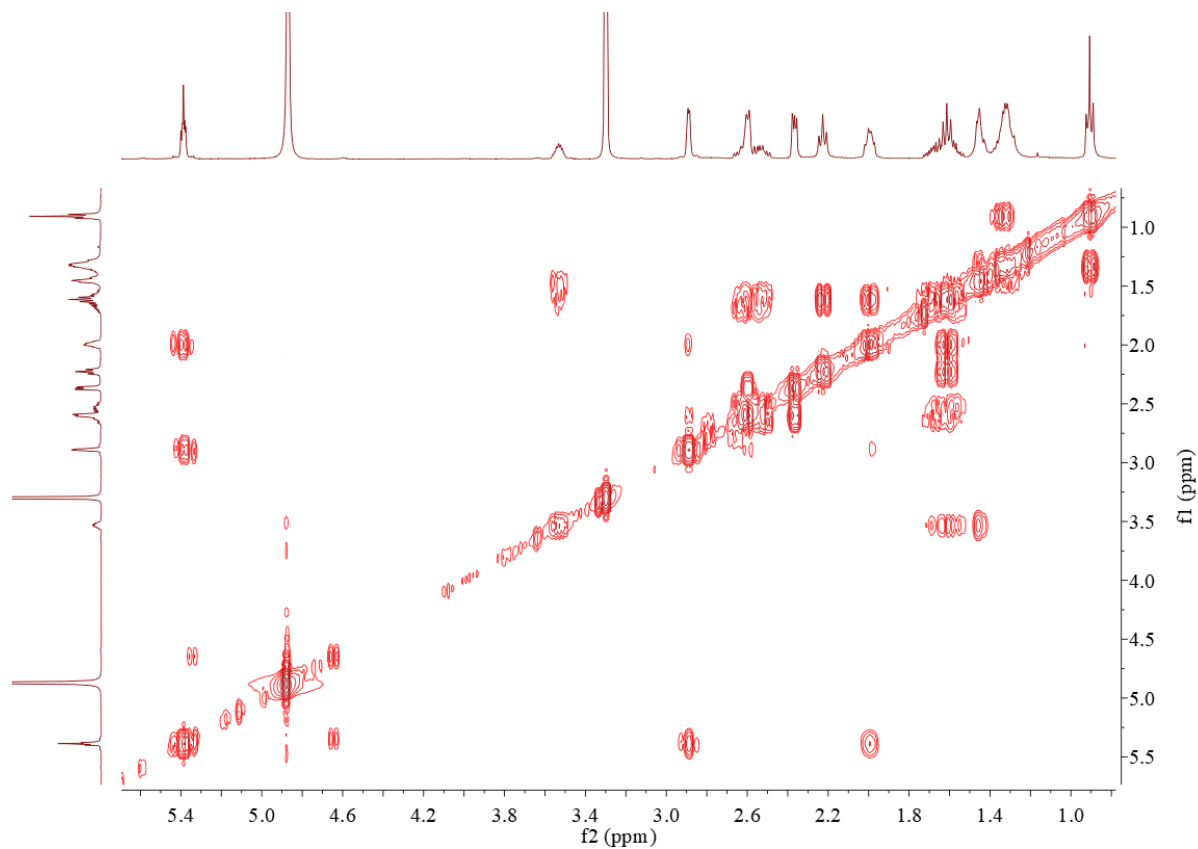

**Figure S30.** HSQC spectrum of **11** in  $\text{MeOH-}d_4$ .

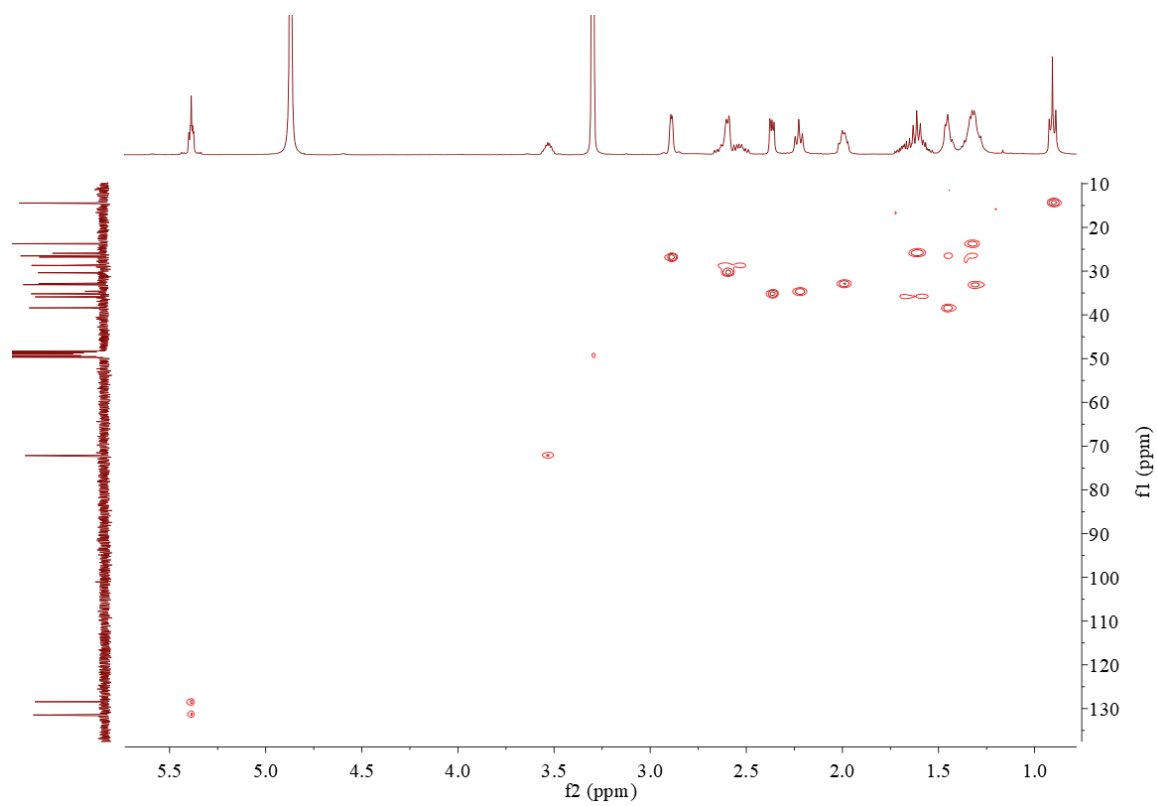

**Figure S31.** HMBC spectrum of **11** in MeOH-*d*<sub>4</sub>

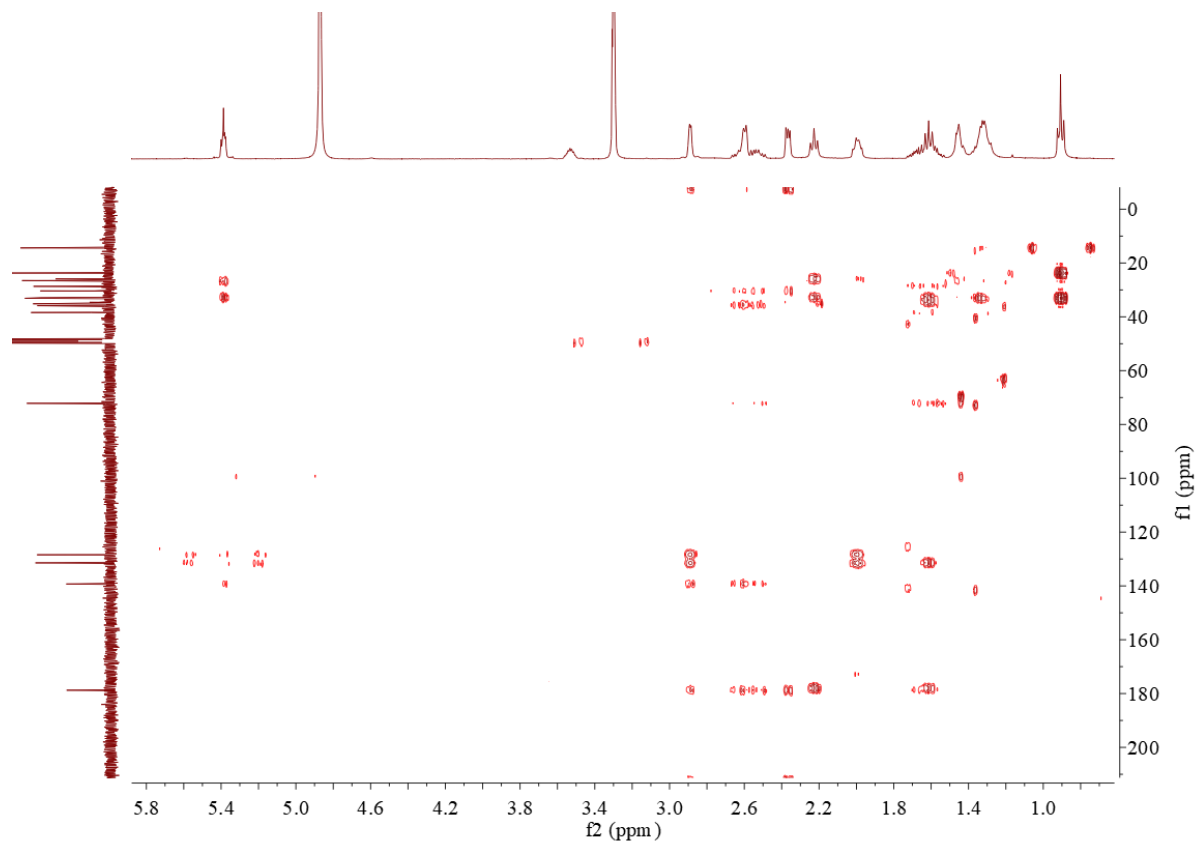

**Figure S32.** HR-ESIMS of **12**

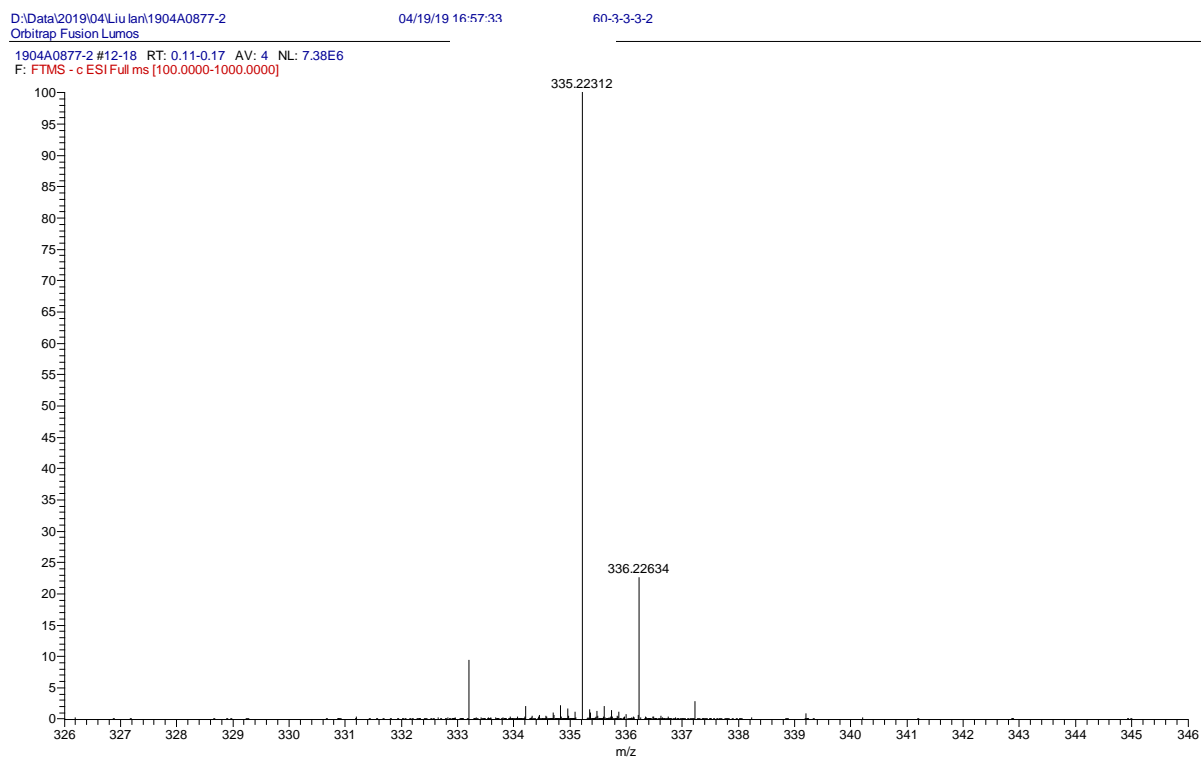

**Figure S33.** IR spectrum of **12**

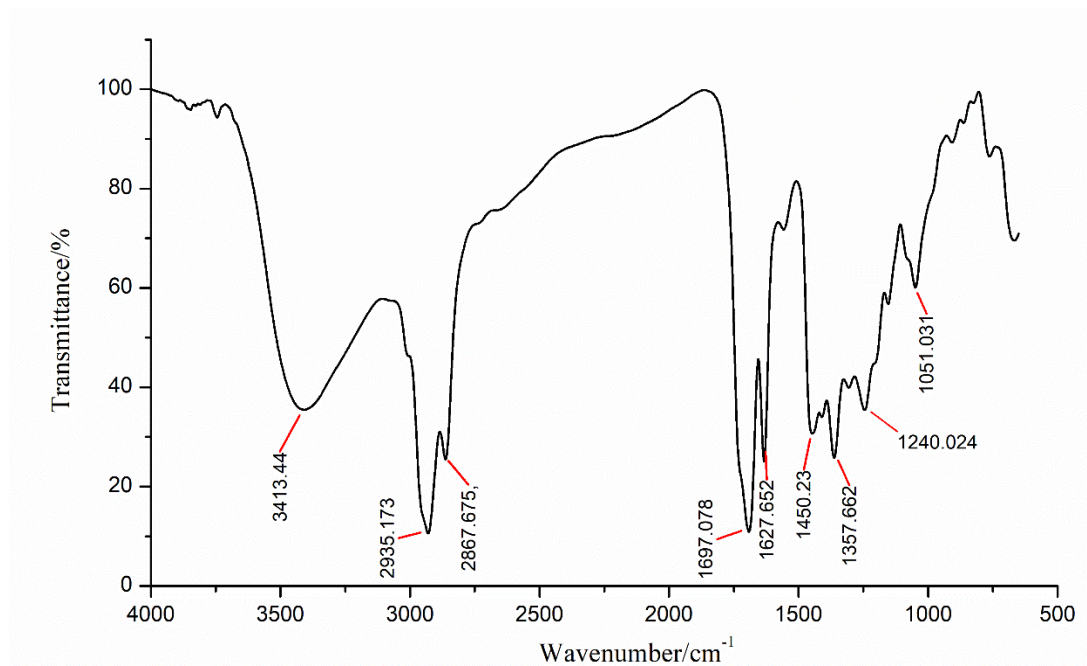

**Figure S34.**  $^1\text{H}$  (400 MHz) NMR spectrum of **12** in  $\text{MeOH-}d_4$

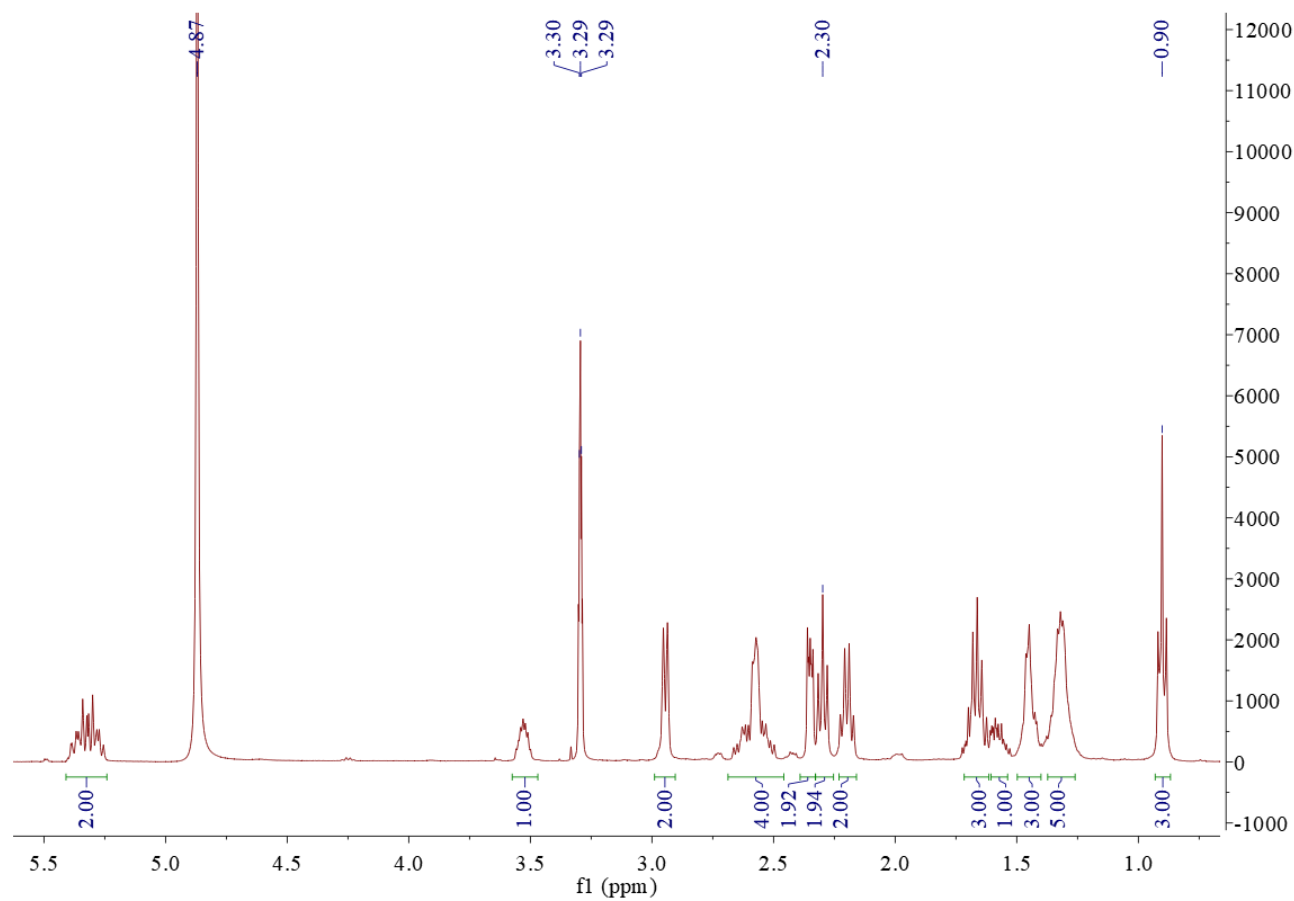

**Figure S35.**  $^{13}\text{C}$  NMR spectrum of **11** in  $\text{MeOH-}d_4$

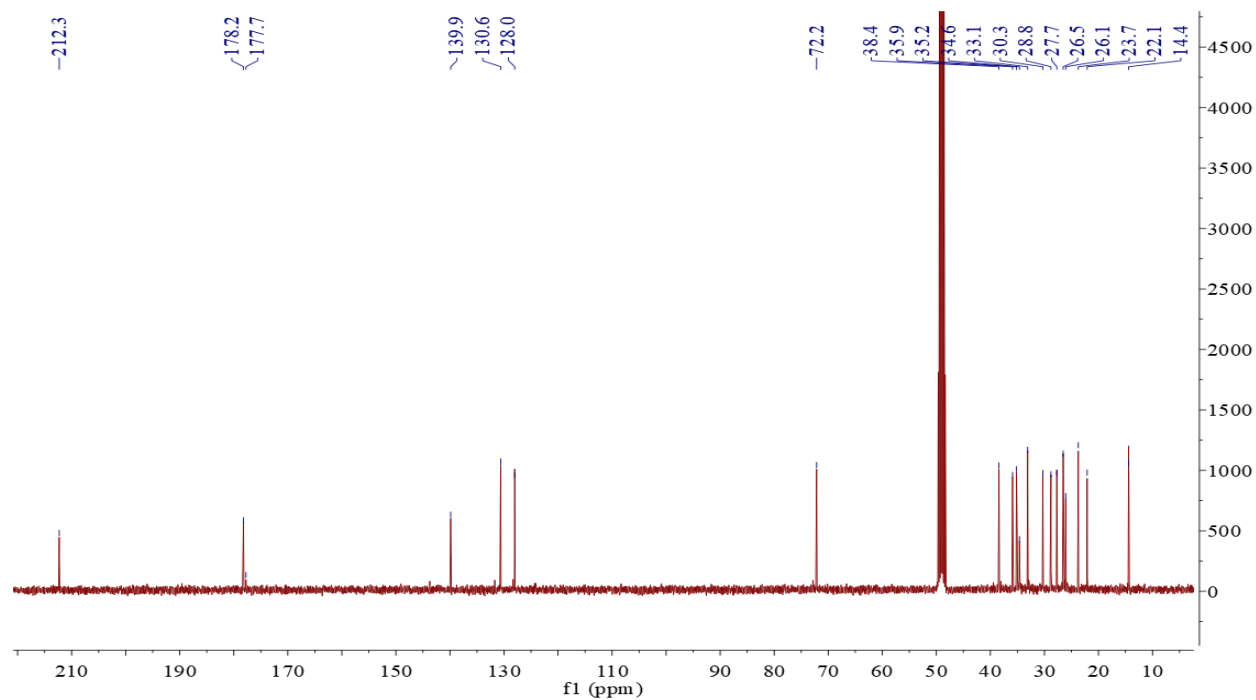

**Figure S36.**  $^1\text{H}$ - $^1\text{H}$  COSY spectrum of **12** in  $\text{MeOH-}d_4$

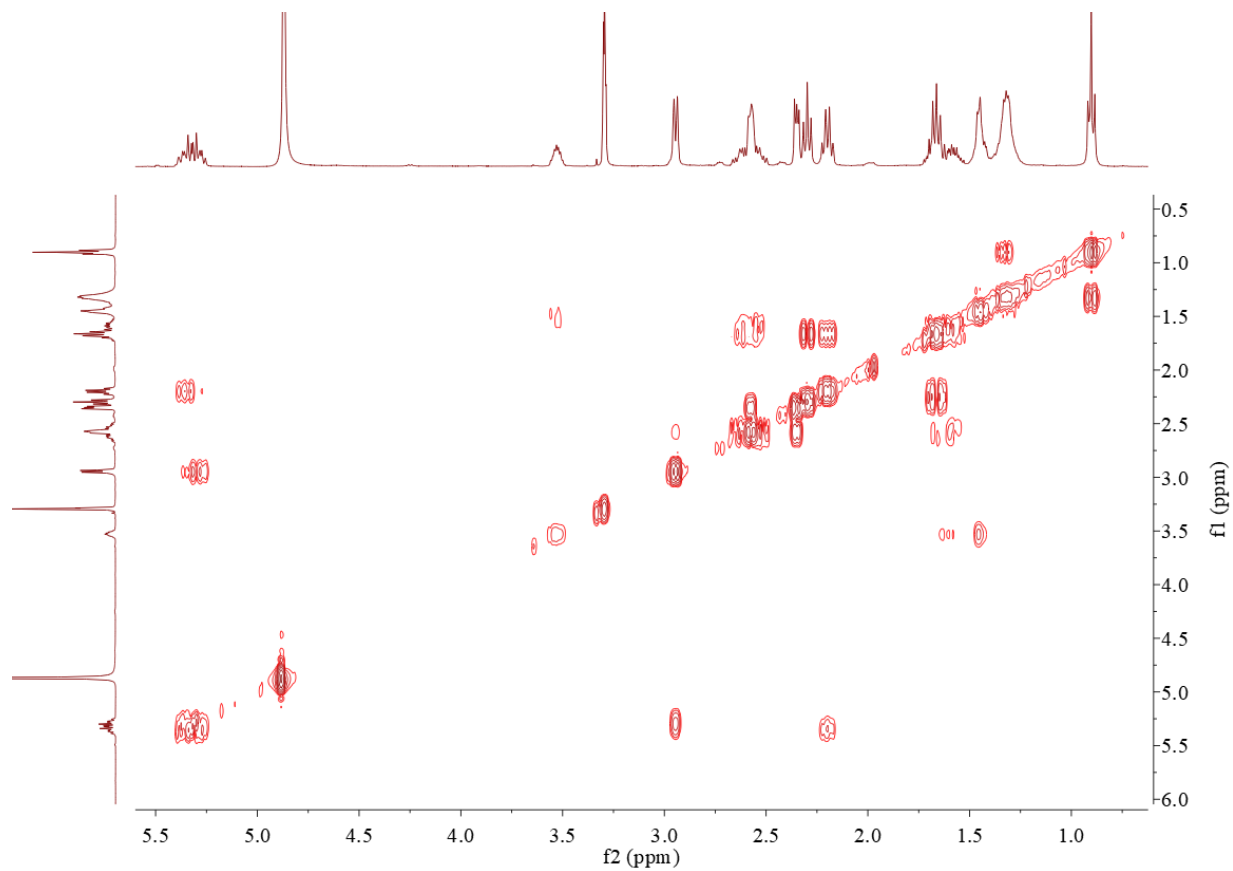

**Figure S37.** HSQC spectrum of **12** in  $\text{MeOH-}d_4$

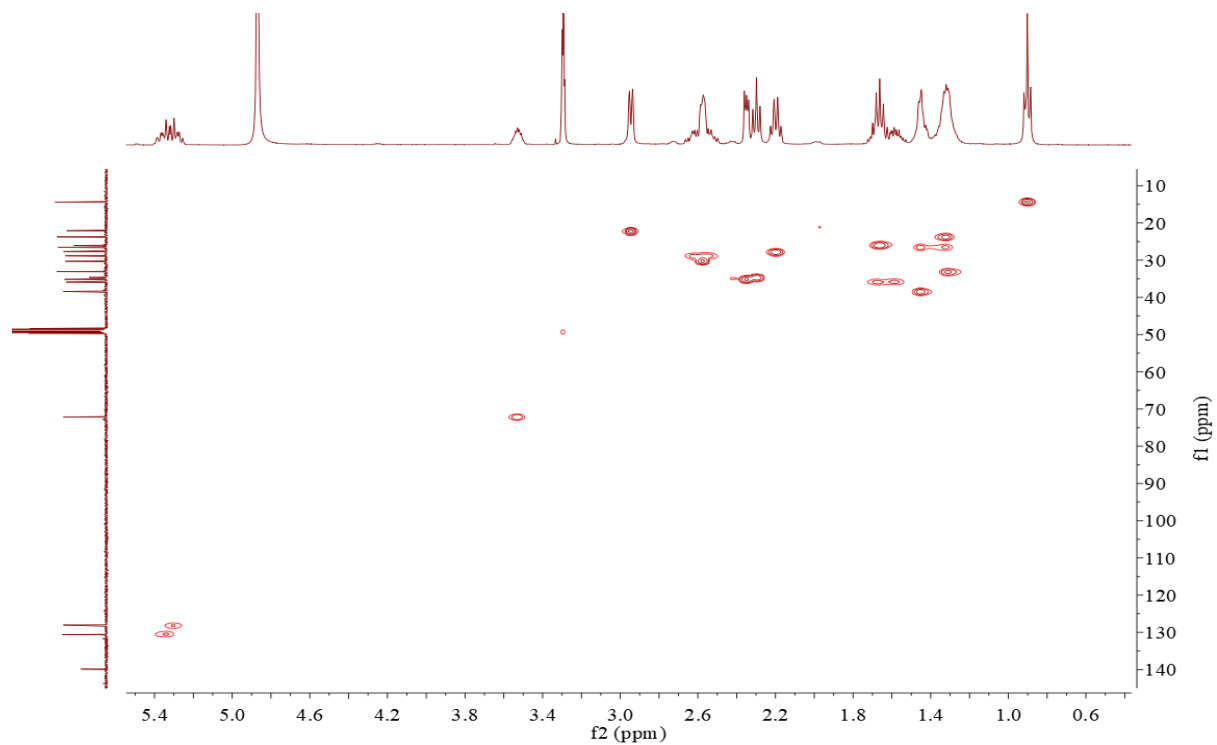

**Figure S38.** HMBC spectrum of **12** in MeOH-*d*<sub>4</sub>

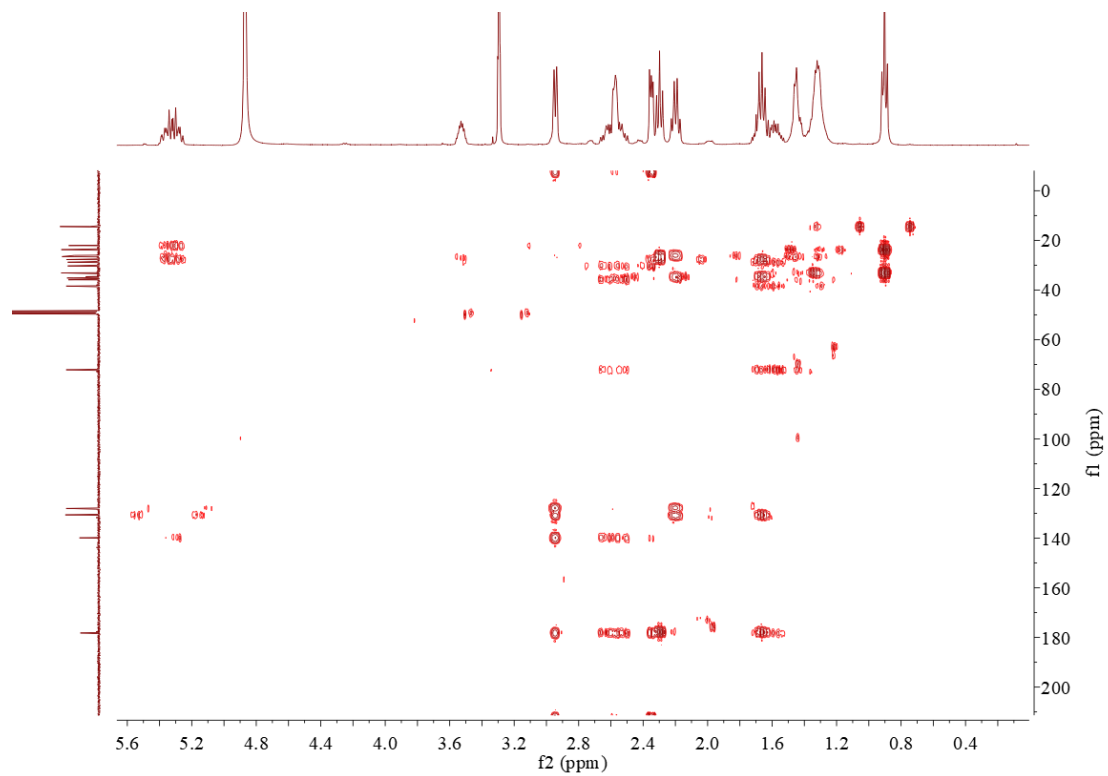

**Figure S39.** NOESY spectrum of **12** in MeOH-*d*<sub>4</sub>

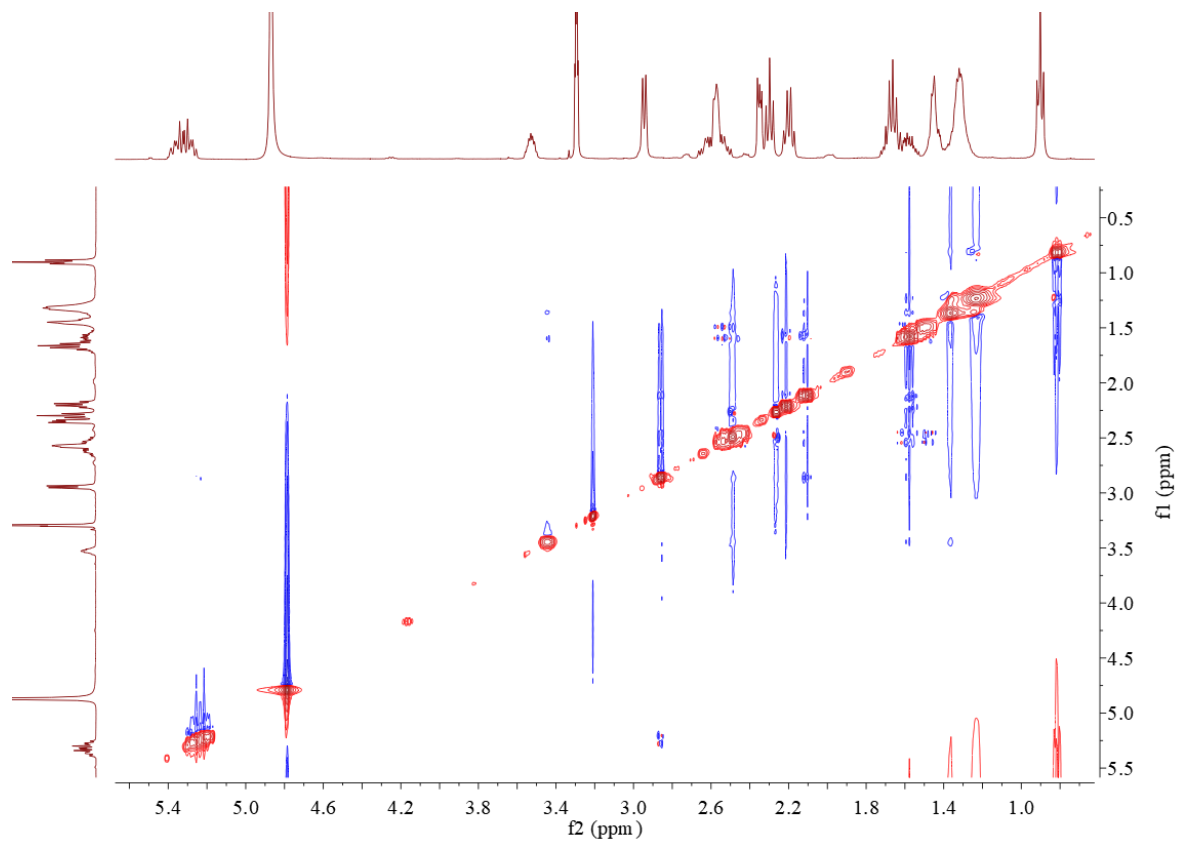



**Figure S40. HR-ESIMS of 13**

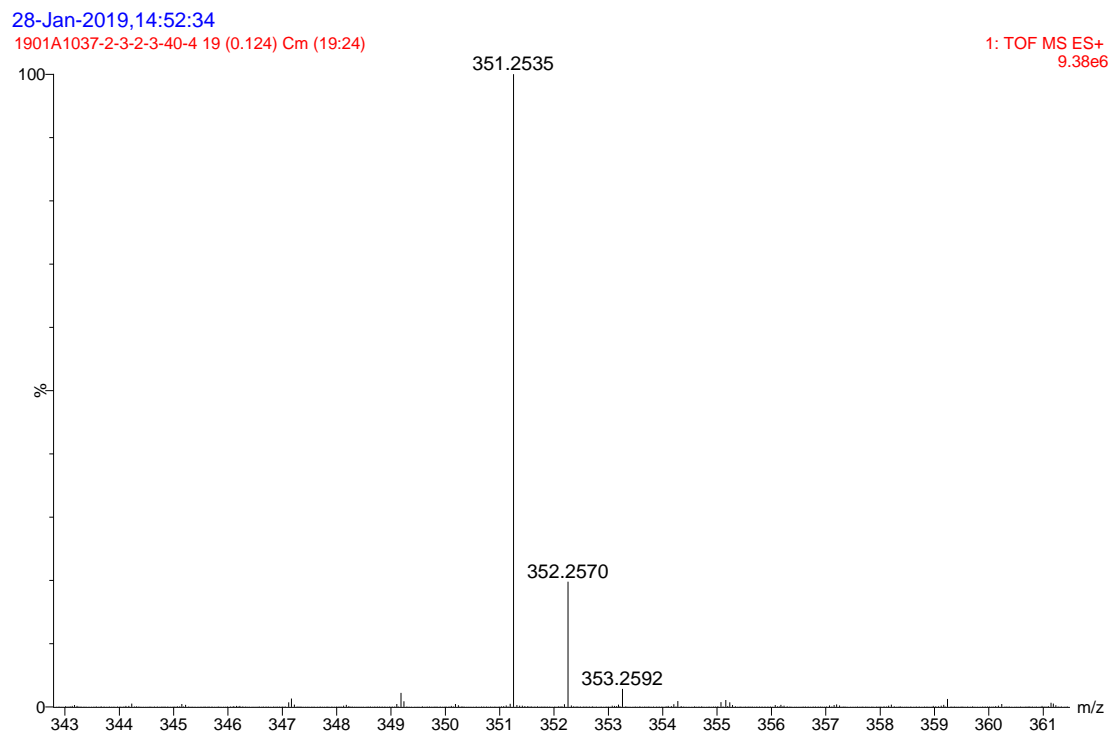

**Figure S41. IR spectrum of 13**

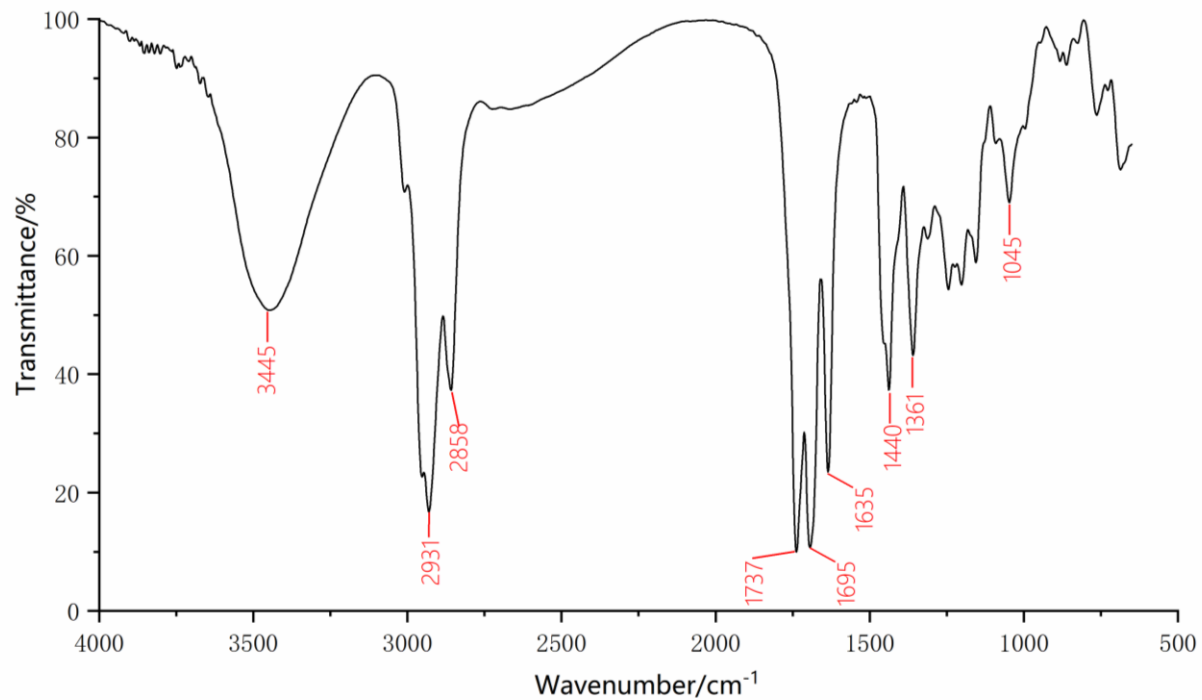

**Figure S42.**  $^1\text{H}$  (400 MHz) NMR spectrum of **13** in acetone- $d_6$ .

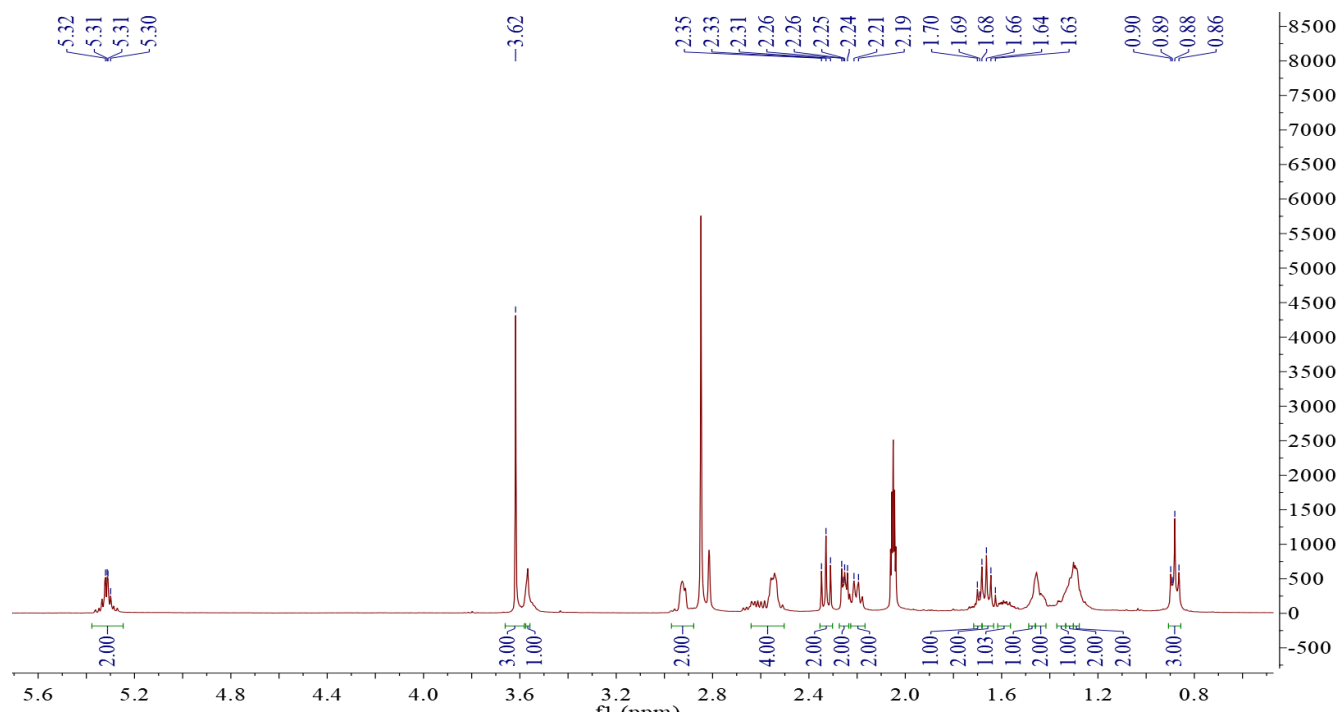

**Figure S43.**  $^{13}\text{C}$  NMR spectrum of **13** in acetone- $d_6$ .

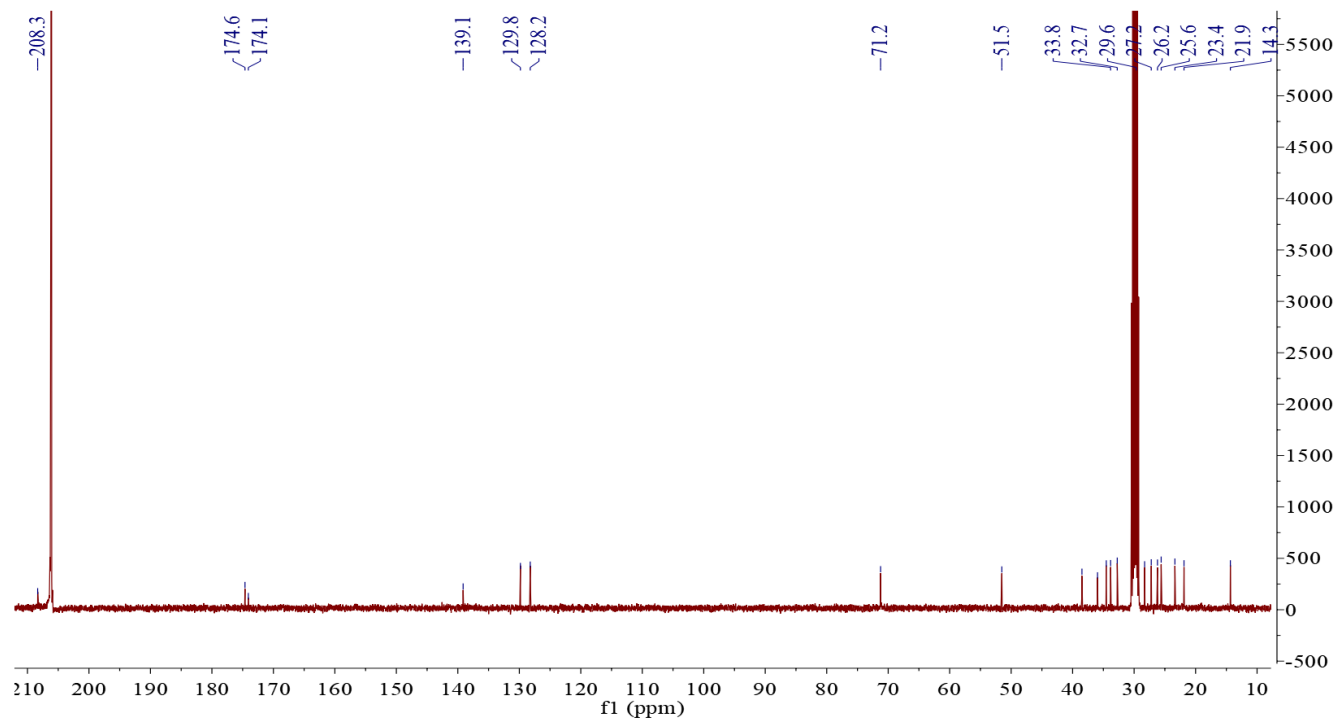

**Figure S44.**  $^1\text{H}$ - $^1\text{H}$  COSY spectrum of **13** in acetone- $d_6$ .

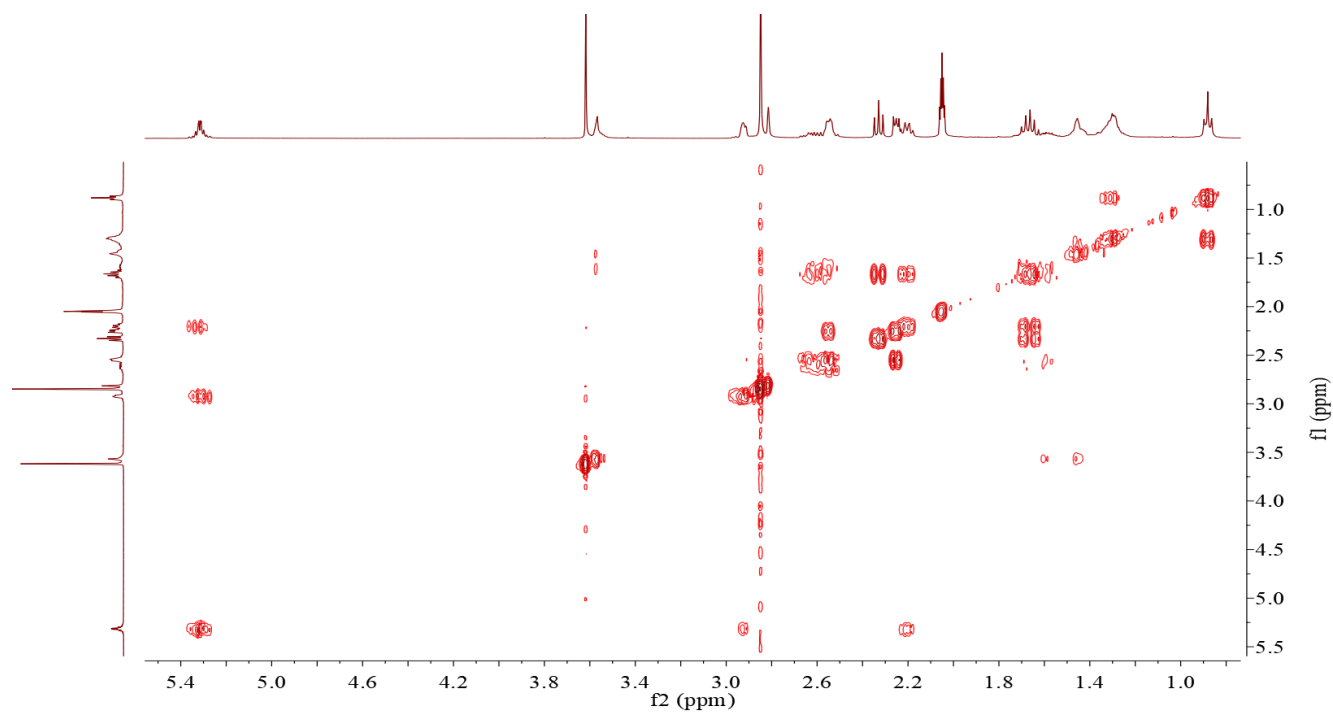

**Figure S45.** HSQC spectrum of **13** in acetone- $d_6$ .

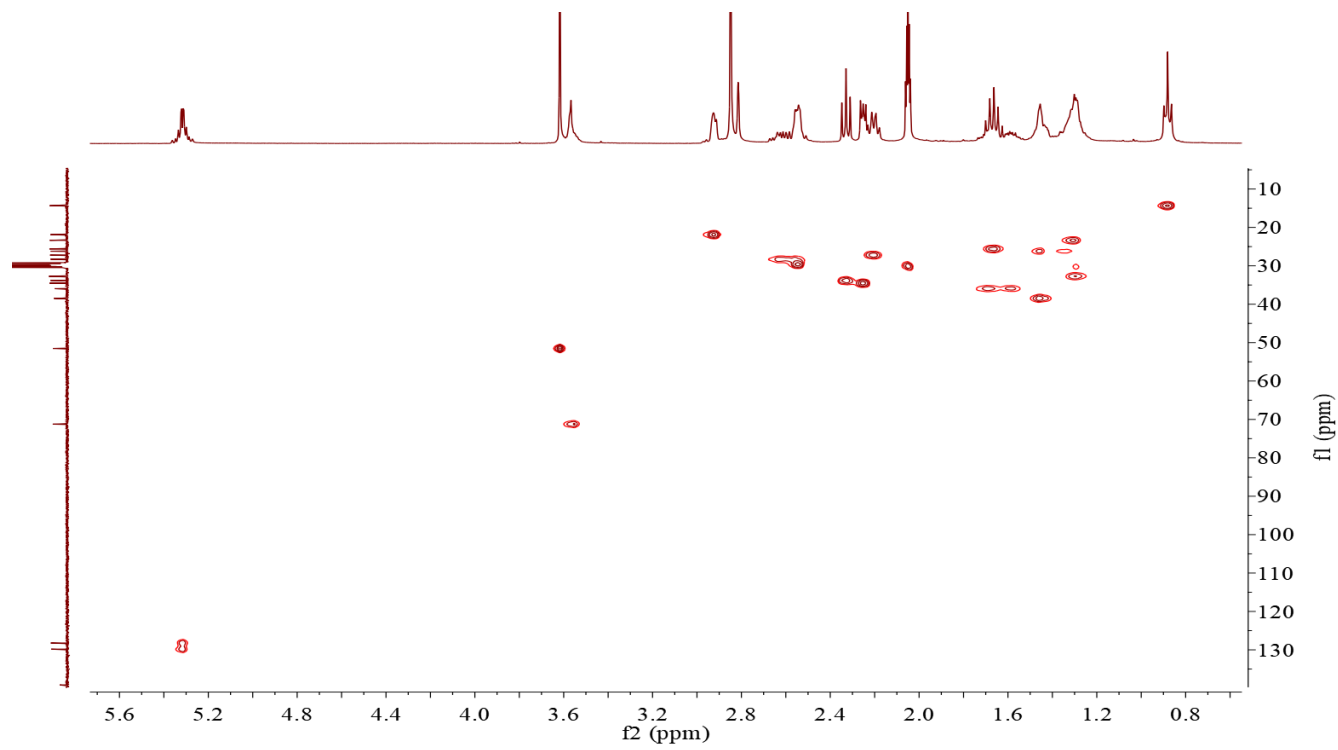

**Figure S46.** HMBC spectrum of **13** in acetone- $d_6$

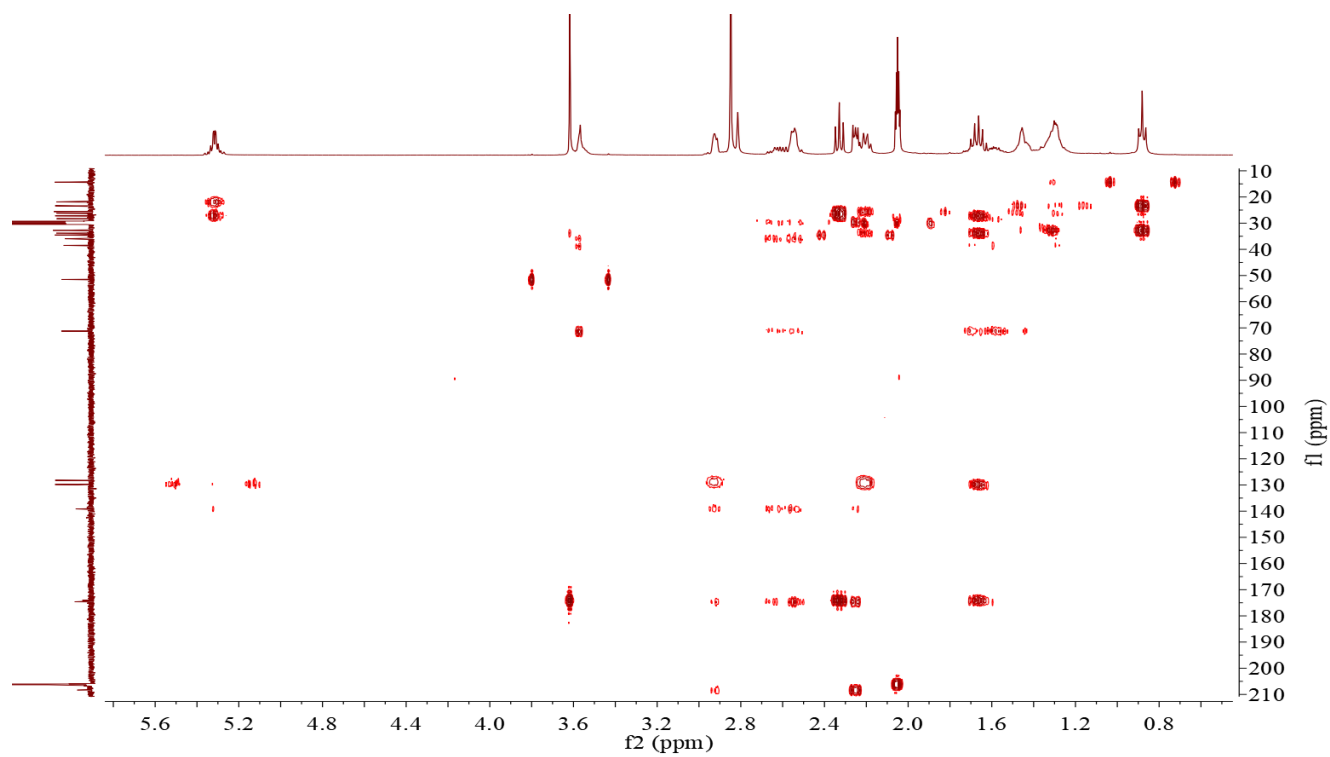

**Figure S47.**  $^1\text{H}$  (400 MHz) NMR spectrum of **10a** in pyridine- $d_5$

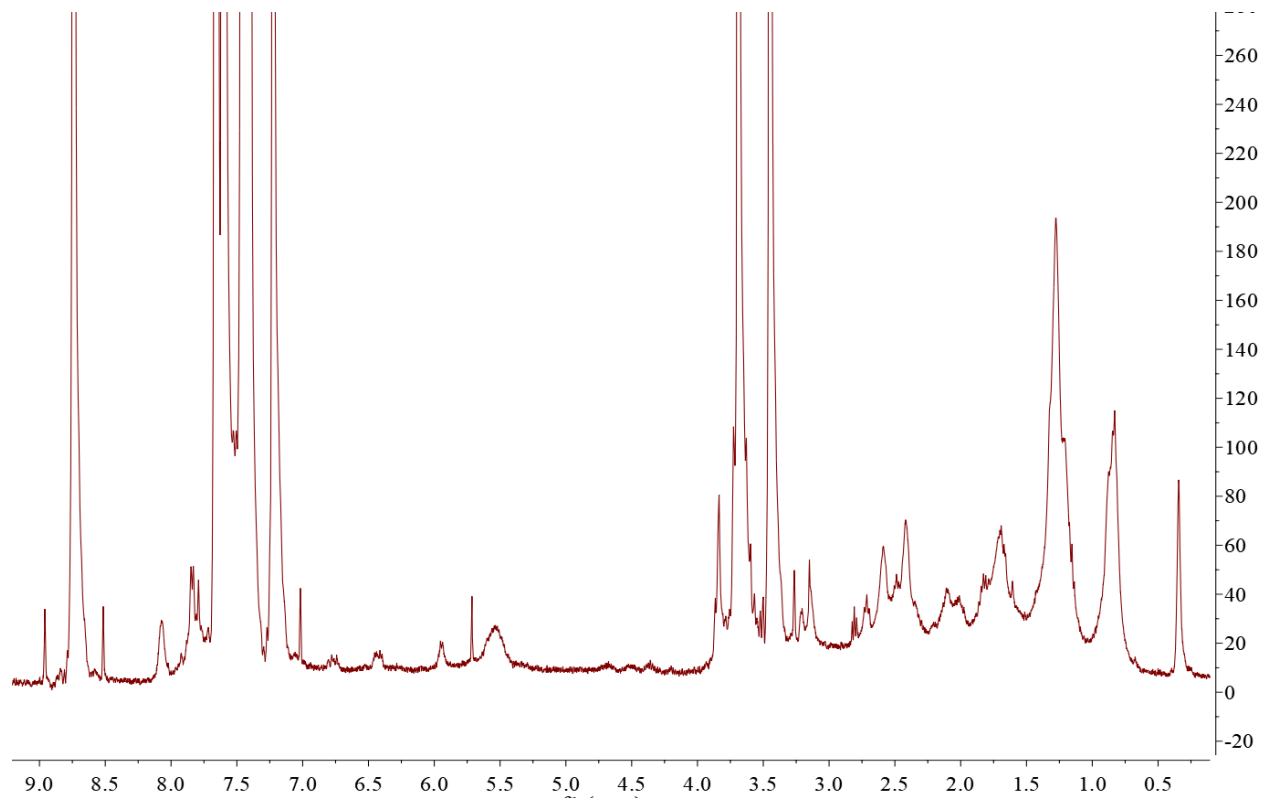

**Figure S48.**  $^1\text{H}$  (400 MHz) NMR spectrum of **10b** in pyridine- $d_5$

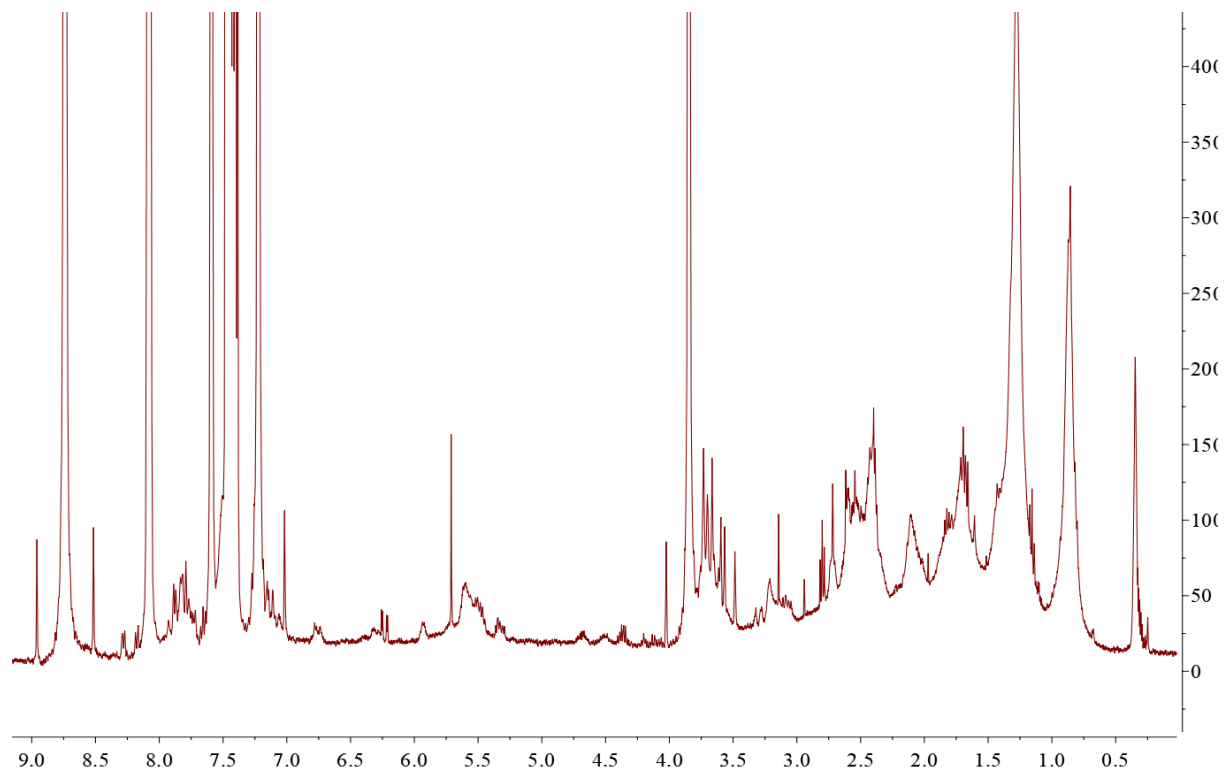

**Figure S49.**  $^1\text{H}$  (400 MHz) NMR spectrum of **15a** in pyridine- $d_5$

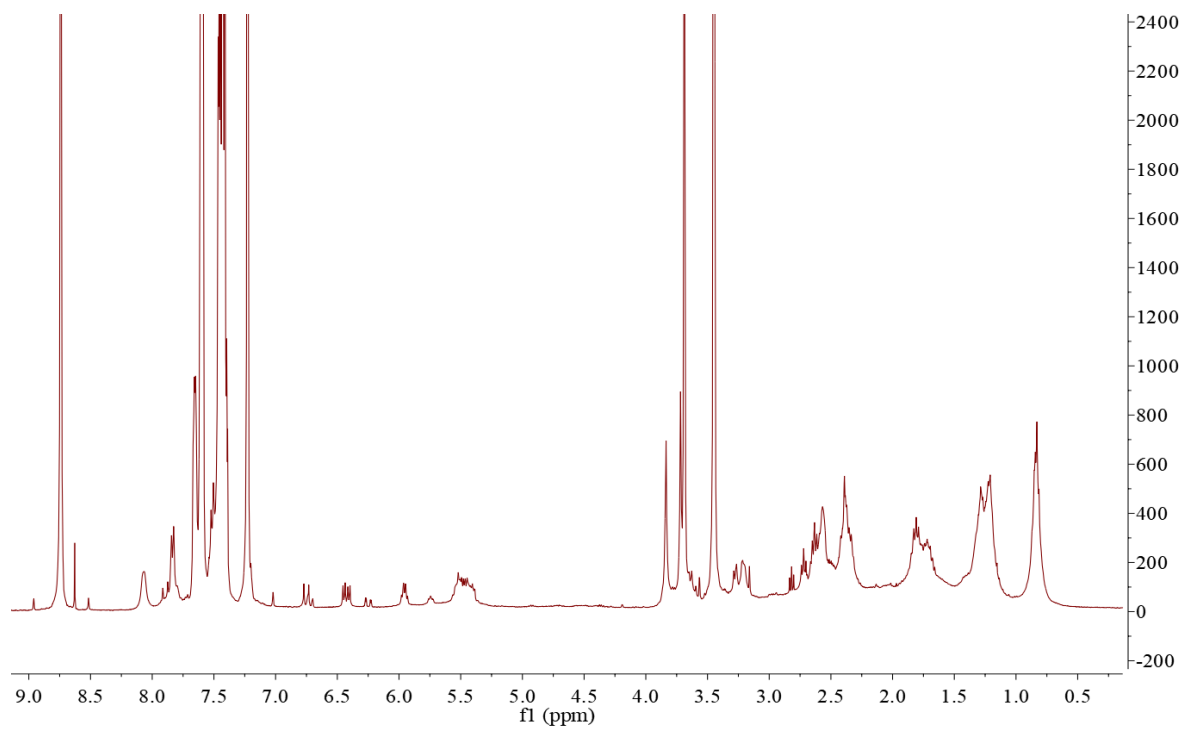

**Figure S50.**  $^1\text{H}$ - $^1\text{H}$  COSY spectrum of **15a** in pyridine- $d_5$

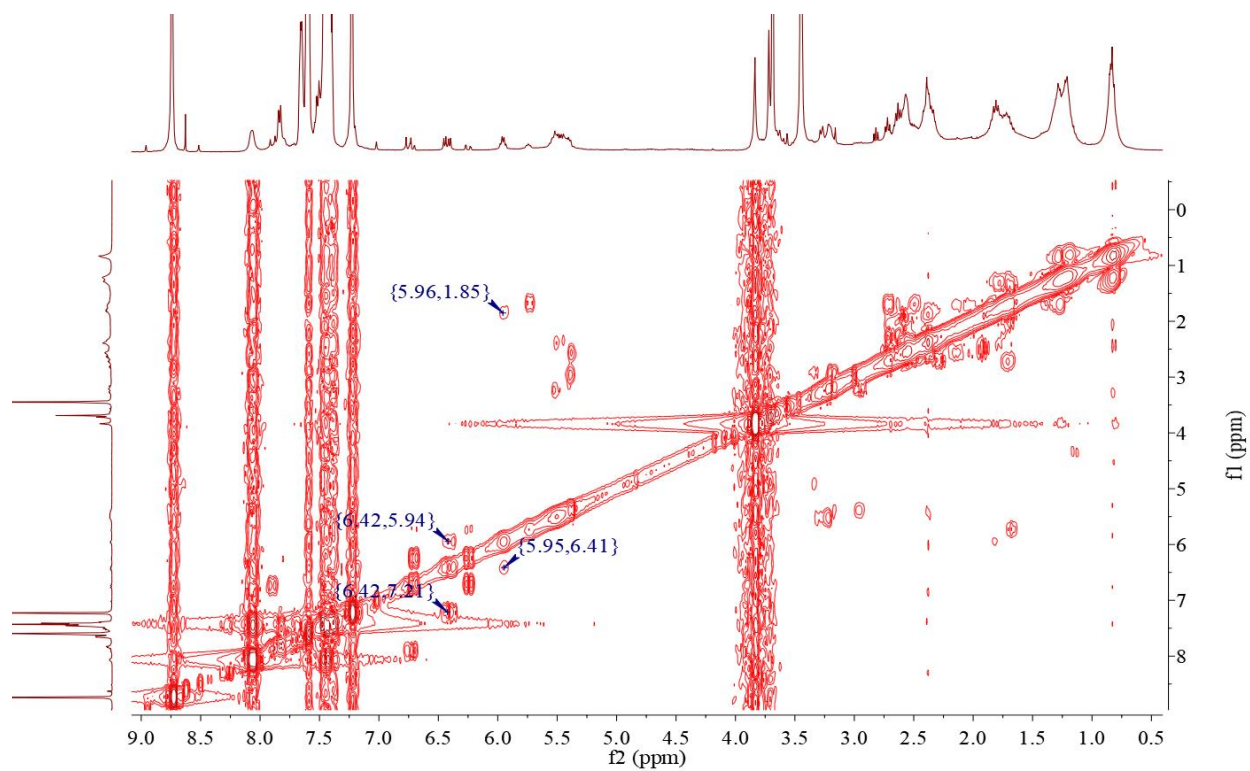

**Figure S51.**  $^1\text{H}$  (400 MHz) NMR spectrum of **15b** in pyridine- $d_5$

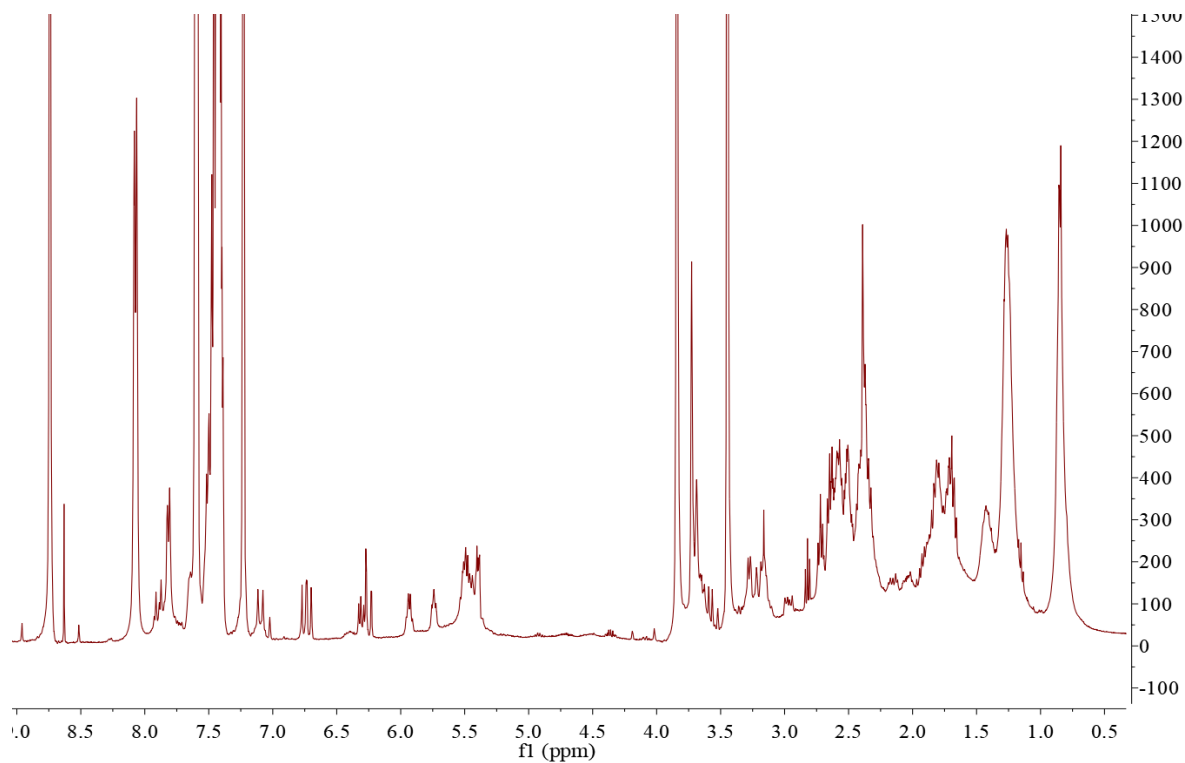

**Figure S52.**  $^1\text{H}$ - $^1\text{H}$  COSY spectrum of **15b** in pyridine- $d_5$

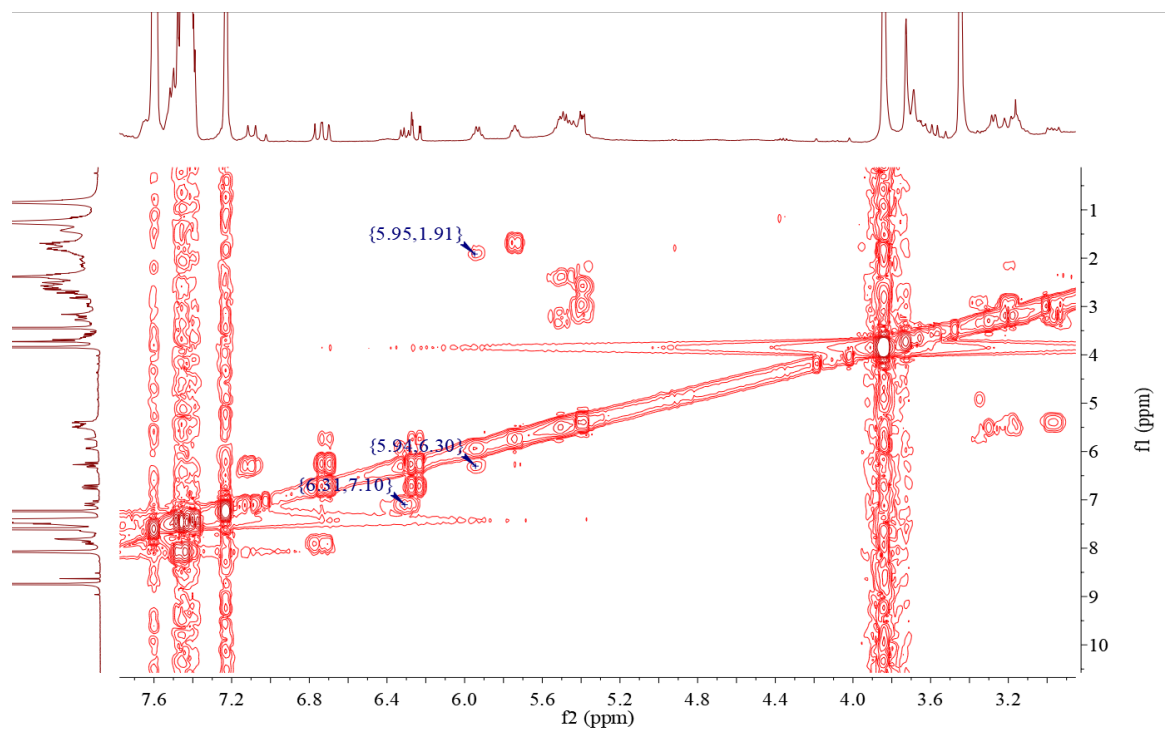

Supplement: marinedrugs-17-00481-s001.pdf [file marinedrugs-17-00481-s001.pdf]
